1 **IWS1 phosphorylation by AKT3 controls nuclear export of type I IFN mRNAs and**  
2 **sensitivity to oncolytic viral infection, by regulating the alternative RNA splicing of**  
3 **U2AF2.**

4  
5 Georgios I. Laliotis<sup>1,2,9\*</sup>, Adam D. Kenney<sup>3</sup>, Evangelia Chavdoula<sup>1</sup>, Arturo Orlacchio<sup>1</sup>, Abdul  
6 Kaba<sup>1</sup>, Alessandro La Ferlita<sup>1,4</sup>, Vollter Anastas<sup>1,5</sup>, Christos Tsatsanis<sup>2,6</sup>, Joal D. Beane<sup>2,7</sup>, Lalit  
7 Sehgal<sup>8</sup>, Vincenzo Coppola<sup>1,2</sup>, Jacob S. Yount<sup>3</sup> and Philip N. Tsiichlis<sup>1,10\*</sup>

8  
9 <sup>1</sup>Department of Cancer Biology and Genetics, and The Ohio State University Comprehensive Cancer Center  
10 Columbus, OH, 43210, <sup>2</sup>University of Crete, School of Medicine, Heraklion Crete, Greece, 71500 <sup>3</sup>Department of  
11 Microbial Infection and Immunity and Infectious Diseases Institute, The Ohio State University, Columbus, OH,  
12 43210, <sup>4</sup>Department of Clinical and Experimental Medicine, Bioinformatics Unit, University of Catania, Catania,  
13 Italy 95131, <sup>5</sup>Tufts Graduate School of Biomedical Sciences, Program in Genetics, Boston, MA, 02111 <sup>6</sup>Institute of  
14 Molecular Biology and Biotechnology, Heraklion, Crete, Greece 70013, <sup>7</sup>Department of Surgery, Division of  
15 Surgical Oncology, Columbus, OH 43210 <sup>8</sup>Department of Medicine, Division of Hematology, The Ohio State  
16 University, Columbus, OH 43210.

17  
18  
19 Running Title: IWS1, mRNA trafficking, and sensitivity to viral infection

20  
21 <sup>9</sup>Present address : Sidney Kimmel Comprehensive Cancer Center and Department of Oncology, Johns Hopkins  
22 School of Medicine, Baltimore, MD 21205 USA

23 <sup>10</sup>Lead Contact

24  
25  
26  
27 \*Corresponding authors: Philip N. Tsiichlis Email: [Philip.tsiichlis@osumc.edu](mailto:Philip.tsiichlis@osumc.edu) and Georgios I.  
28 Laliotis. Current Email: [glaliot1@jhmi.edu](mailto:glaliot1@jhmi.edu)

29  
30

31  
32  
33  
34  
35  
36  
37  
38  
39  
40  
41  
42  
43  
44  
45  
46  
47  
48  
49  
50  
51  
52  
53  
54  
55  
56  
57

**Abstract**

AKT-phosphorylated IWS1 promotes Histone H3K36 trimethylation and alternative RNA splicing of target genes, including the U2AF65 splicing factor-encoding *U2AF2*. The predominant *U2AF2* transcript, upon IWS1 phosphorylation block, lacks the RS-domain-encoding exon 2, and encodes a protein which fails to bind Prp19. Here we show that although both U2AF65 isoforms bind intronless mRNAs containing cytoplasmic accumulation region elements (CAR-E), only the RS domain-containing U2AF65 recruits Prp19 and promotes their nuclear export. The loading of U2AF65 to CAR-Elements was RS domain-independent, but RNA PolIII-dependent. Virus- or poly(I:C)-induced type I IFNs are encoded by genes targeted by the pathway. IWS1 phosphorylation-deficient cells therefore, express reduced levels of IFN $\alpha$ 1/IFN $\beta$ 1 proteins, and exhibit enhanced sensitivity to infection by multiple cytolytic viruses. Enhanced sensitivity of IWS1-deficient cells to Vesicular Stomatitis Virus and Reovirus resulted in enhanced apoptotic cell death via caspase activation. Inhibition of this pathway may therefore sensitize cancer cells to oncolytic viruses.

## 58 Introduction

59 AKT regulates alternative RNA splicing (Sanidas et al., 2014<sup>1</sup>, Zhou et al., 2012<sup>2</sup>). Our  
60 earlier studies addressing this critical AKT function, identified a pathway that plays a major  
61 role in its regulation. The first step in this pathway is the phosphorylation of IWS1 at  
62 Ser720/Thr721 by AKT3 and AKT1, but not by AKT2. Following phosphorylation, IWS1  
63 recruits the Histone methyltransferase SETD2 to an SPT6/IWS1/ALY-REF complex, which  
64 assembles on the Ser2-phosphorylated C-terminal domain (CTD) of RNA Pol II. During  
65 transcription, SETD2 trimethylates Histone H3 on K36 in the body of transcribed target genes,  
66 and this is recognized by several H3K36me3 readers, which initiate the process of alternative  
67 RNA splicing (Sanidas et al., 2014<sup>1</sup>, Laliotis et al., 2021<sup>3</sup>). One of the genes whose alternative  
68 RNA splicing is regulated by this pathway is *U2AF2*, which encodes the core RNA splicing  
69 factor, U2AF65. Phosphorylation of IWS1 by AKT3 and AKT1 promotes the inclusion of this  
70 exon 2 in the mature *U2AF2* mRNA transcript. This exon encodes part of the RS domain of  
71 U2AF65, which is required for U2AF65 binding to Prp19, a member of a seven-member protein  
72 complex (PRP19C), with ubiquitin ligase activity, which is also involved in RNA splicing.  
73 Importantly, this pathway is cell cycle regulated and some of its target genes are regulators of  
74 the cell cycle. As a result, it promotes cell proliferation and tumor growth (Laliotis et al., 2021<sup>3</sup>).

75 Earlier studies had shown that U2AF65 and Prp19 also regulate the nuclear export of  
76 the mRNAs of a set of intronless genes (Lei et al., 2013<sup>4</sup>). The common feature of these  
77 mRNAs is that they all possess one or more 10 nucleotide long motifs, which are involved in  
78 their nuclear export and are known as Cytoplasmic Accumulation Region Elements (CAR-E)  
79 (de Padilla et al., 2014<sup>5</sup>). The functional activity of these elements depends on the binding of  
80 the Transcription-Export (TREX) complex, the U2 Associated-Factor 2 (*U2AF2*)-encoded  
81 splicing factor U2AF65, and the pre-mRNA Processing Factor 19 complex (Prp19C) (Lei et  
82 al., 2013<sup>4</sup>). Given that this process depends on U2AF65 and Prp19, whose interaction  
83 depends on the activity of the AKT/IWS1 axis, we hypothesized that the nuclear export of the  
84 mRNAs of these intronless genes will depend on IWS1 and its phosphorylation by AKT.

85 Prominent among the CAR-E-positive intronless genes are the genes encoding type I  
86 Interferons (IFNs) (de Padilla et al., 2014<sup>5</sup>). We therefore reasoned that the expression of type  
87 I IFNs may also be regulated by this AKT-dependent pathway. Type I IFNs are members of a  
88 large family of cytokines, known for their role in the regulation of innate and adaptive immunity  
89 and the antiviral response. They include *IFNA*, with 13 members and *IFNB*, with only one  
90 member (Frisch et al., 2020<sup>6</sup>) and they engage the heterodimeric receptor IFNAR1/IFNAR2,  
91 which is widely expressed (Schreiber et al., 2017<sup>7</sup>). The genes encoding type I IFNs are  
92 induced by signals initiated through the activation of Pattern Recognition Receptors (PRRs),  
93 the sensors of innate immunity (Acosta et al., 2020<sup>8</sup>). These receptors recognize molecules  
94 presented by pathogens (pathogen-associated molecular patterns, PAMPs), such as bacterial  
95 lipopolysaccharides, flagellin, bacterial lipoproteins, double-stranded RNA (dsRNA) and  
96 cytosolic DNA (Amarante-Mendes et al., 2018<sup>9</sup>). PRR signals regulate multiple signaling  
97 pathways, including the I $\kappa$ B Kinase (IKK) pathway, which phosphorylates and activates the  
98 transcription factors IRF3 and NF- $\kappa$ B. These factors transactivate the *IFNB1* gene (Ablasser  
99 et al., 2020<sup>10</sup>) and induce the expression of IFN $\beta$ . The latter acts in an autocrine or paracrine  
100 manner to activate JAK1 and TYK2, which phosphorylate STAT1 and STAT2 and promote the  
101 formation of the trimeric complex STAT1-STAT2-IRF9, known as the Interferon Stimulated  
102 Gene Factor 3 (ISGF3). This complex binds palindromic DNA sequences, known as IFN-  
103 stimulated Response Elements (ISREs) in the promoters of interferon-stimulated genes  
104 (ISGs) and promotes their expression (Aleynick et al., 2019<sup>11</sup>). One of these genes is the gene  
105 encoding the transcription factor IRF7, which along with the transcription factors IRF3 and  
106 IRF5, is required for the induction of *IFNA* and the full type I IFN response (Lu et al., 2000<sup>12</sup>,  
107 Conzelmann et al., 2005<sup>13</sup>, Lazear et al., 2013<sup>14</sup>).

108 The regulation of type I IFN signaling has important implications in the regulation of  
109 innate and adaptive immunity, along with the control of viral infection and replication. The  
110 pathways regulating type I IFN signaling are receiving added attention in recent years, due to  
111 the emergence of cytotoxic oncolytic viruses (OVs) as a new class of anti-cancer therapeutics

112 (Park et al., 2020<sup>15</sup>). The first clinically approved OV, Talimogene laherparepvec (TVEC), is a  
113 genetically modified type I herpes simplex virus (HSV) that expresses granulocyte-  
114 macrophage colony-stimulating factor (GM-CSF) (Rehman et al., 2016<sup>16</sup>) and is now  
115 incorporated in the treatment protocols of a select group of patients with melanoma. However,  
116 most OVs exhibit only weak antitumor activity, especially when used as monotherapy  
117 (Martinez-Quintanilla et al., 2019<sup>17</sup>). This could potentially change by targeting type I IFN  
118 signaling and altering the sensitivity of the tumor cells to infection by such viruses.

119 Earlier studies had shown that the type I IFN response is regulated by multiple  
120 signaling pathways. Among them, the AKT pathway regulates the IFN response at multiple  
121 levels. By activating the mechanistic target of rapamycin (mTOR), AKT promotes the  
122 translation of Interferon-stimulated genes (ISGs) (Kroczyńska et al., 2014<sup>18</sup>). Subsequent  
123 studies revealed that AKT1 activates  $\beta$ -catenin by phosphorylation at Ser552 and that the  
124 activated  $\beta$ -catenin promotes the transcriptional activation of *IFNB* (Gantner et al., 2012<sup>19</sup>). In  
125 addition, we have also shown that AKT1 selectively phosphorylates EMSY at Ser209, relieving  
126 the EMSY-mediated repression of IFN-stimulated genes (ISGs) (Ezell et al., 2012<sup>20</sup>).

127 Data presented in this report fully support the hypothesis that the AKT/IWS1/U2AF2  
128 axis regulates the nuclear export and expression of type I IFN genes, and by doing so, they  
129 identify yet another pathway by which AKT regulates IFN gene expression. They also show  
130 that this pathway plays a critical role in the regulation of type I IFN gene expression, because  
131 inhibiting this pathway essentially blocks the IFN response and dramatically increases the  
132 sensitivity of the cells to infection by cytolytic viruses and virus-induced cell death.

## 133 Results

### 134 **IWS1 phosphorylation regulates the nucleocytoplasmic transport of mRNAs** 135 **transcribed from a set of intronless genes, via a process that depends on the alternative** 136 **splicing of *U2AF2*.**

137 Our earlier studies had shown that the knockdown of IWS1 and its replacement by the  
138 non-phosphorylatable mutant IWS1 S720A/T721A alter the RNA splicing pattern of *U2AF2*  
139 giving rise to a mature mRNA that lacks exon 2. The *U2AF2* splicing variant lacking exon 2  
140 encodes a variant of the U2AF65 core splicing factor with a partial deletion of the RS domain  
141 (Laliotis et al., 2021<sup>3</sup>). Importantly, whereas the RS domain-containing U2AF65 binds Prp19,  
142 a component of a seven-member complex with ubiquitin ligase activity, which is also involved  
143 in the regulation of RNA splicing, the RS domain-deficient U2AF65 does not (R. Hogg et al.,  
144 2010<sup>21</sup>, Chanarat S. et al., 2013<sup>22</sup>). More important, U2AF65 and Prp19, along with the TREX  
145 complex, bind RNA motifs, designated as cytoplasmic accumulation region elements (CAR-  
146 E), which are present in, and promote the nucleocytoplasmic transport of most mRNAs  
147 transcribed from naturally intronless genes (Lei et al., 2013<sup>4</sup>).

148 mRNAs whose nucleocytoplasmic transport is regulated by this mechanism include  
149 those transcribed from *IFNA1* (encoding IFN $\alpha$ 1), *IFNB1* (encoding IFN $\beta$ 1), *HSPB3* (encoding  
150 Hsp27) and *JUN* (Lei et al., 2013<sup>4</sup>). We therefore asked whether *U2AF2* alternative RNA  
151 splicing downstream of IWS1 phosphorylation, regulates the nuclear export of the mRNAs  
152 transcribed from these genes. To address this question, we first engineered shControl,  
153 shIWS1, shIWS1/wild type IWS1-rescue (shIWS1/WT-R), shIWS1/IWS1-S720A/T721A-  
154 rescue (shIWS1/MT-R) and shIWS1/U2AF65 $\alpha$ -rescue or shIWS1/U2AF65 $\beta$ -rescue NCI-H522  
155 and NCI-H1299 lung adenocarcinoma cells. Notably, the IWS1 rescue clones were  
156 engineered to be shIWS1 resistant (Sanidas et al., 2014<sup>1</sup>, Laliotis et al., 2021<sup>3</sup>). U2AF65 $\alpha$  and  
157 U2AF65 $\beta$  are encoded by the exon 2-containing, and the exon 2-deficient *U2AF2* splice forms,  
158 respectively. To validate these cell lines, we analyzed them for the expression of IWS1,

159 phospho-IWS1 and U2AF65 by western blotting, and for the alternative RNA splicing of *U2AF2*  
160 by RT-PCR (**Fig. 1a**).

161 Following validation, type I IFNs were induced in these cells via infection with a GFP-  
162 expressing Sendai virus, (SeV-GFP) (Yount et al., 2006<sup>23</sup>, Bedsaul et al., 2016<sup>24</sup>). Twenty-four  
163 hours later, and before the emergence of virus-induced cytotoxicity, we fractionated the cells  
164 into nuclear and cytoplasmic fractions and we examined the mRNA levels of *IFNA1*, *IFNB1*,  
165 in the fractions by quantitative RT-PCR. The expression of *HSPB3* and *JUN* was measured,  
166 also with qRT-PCR, in the nuclear and cytoplasmic fractions of similarly fractionated  
167 uninfected cells. The total mRNA levels of these genes were also measured in unfractionated  
168 lysates of the same cells. The results showed that whereas the mRNAs of all four genes are  
169 primarily cytoplasmic in the shControl and WT-R cells, they are primarily nuclear in the shIWS1  
170 and MT-R cells. More important, whereas U2AF65 $\alpha$  rescued the nuclear retention of these  
171 mRNAs in shIWS1 cells, U2AF65 $\beta$  did not (**Fig. 1b, left panel**).

172 The preceding data suggested that IWS1 phosphorylation promotes the nuclear export  
173 of RNAs transcribed from CAR-Element-positive intronless genes and raised the question  
174 whether the RNAs of CAR-Element-negative intronless genes are also targets of this pathway.  
175 To address this question, we first used FIMO motif analysis (Grant et al., 2011<sup>26</sup>) to show that  
176 among the 1724 intronless genes expressed in epithelial cells (Louhichi et al., 2011<sup>27</sup>) 928  
177 (53.38%) are CAR-E-positive and 796 (46.1%) are CAR-E-negative ( $p < 0.05$ ,  $q < 0.1$ )  
178 (**Supplementary Figure 1a, Supplementary Data 1**). Following this, we examined the  
179 nucleocytoplasmic RNA ratio of 25 CAR-Element-positive and 24 CAR-Element-negative  
180 genes in shControl, shIWS1, shIWS1/WT-R and shIWS1/MT-R, as well as in  
181 shIWS1/U2AF65 $\alpha$  and shIWS1/U2AF65 $\beta$  NCI-H522 and NCI-H1299 cells. The results  
182 showed that the export of the RNAs of all these genes was impaired in shIWS1 cells and that  
183 the RNA export defect was rescued by wild type IWS1. However, the phosphorylation site  
184 mutant of IWS1 rescued the export of only the RNAs of the CAR-Element-negative genes.  
185 The shIWS1-induced RNA export defect of only the CAR-Element positive RNAs was also

186 rescued by U2AF65 $\alpha$ , but not U2AF65 $\beta$ . These data combined, show that the nuclear RNA  
187 export of intronless genes described in the report, is specific for the RNAs of genes that are  
188 CAR-Element-positive (**Fig. 1c**).

189 Although the cytoplasmic mRNA levels of *IFNA1*, *IFNB1*, *HSPB3* and *JUN* were  
190 decreased in shIWS1 cells, their total RNA levels were increased. Moreover, their increased  
191 expression was rescued by wild type IWS1, but not by the phosphorylation site IWS1 mutant  
192 (**Fig. 1d**). We conclude that IWS1 normally inhibits the expression of these genes at the RNA  
193 level via a pathway that depends on its phosphorylation by AKT. Importantly, these results  
194 were in agreement with RNA-Seq data derived from 516 lung adenocarcinoma patients in The  
195 Cancer Genome Atlas (TCGA) LUAD database, which revealed negative correlations between  
196 the expression of *IWS1* and *JUN*, *HSBP3* and *IFNA1* (**Supplementary Figure 1b**). Although  
197 the rescue of the shIWS1-induced phenotype by wild type IWS1 and the IWS1 phosphorylation  
198 site mutant gave the expected results, the outcomes of its rescue by U2AF65 $\alpha$  and U2AF65 $\beta$   
199 were unexpected. U2AF65 $\alpha$  rescued the upregulation of type I IFNs, as expected, while  
200 U2AF65 $\beta$  did not. However, both failed to rescue the upregulation of *JUN* and *HSBP3*. We  
201 interpret these data to suggest that the upregulation of the mRNAs of IFN genes in shIWS1  
202 cells may be due to different mechanisms than the upregulation of the mRNAs of other  
203 intronless genes. We hypothesize that the upregulation of type I IFNs may be due to genomic  
204 instability, caused by the downregulation of Sororin, downstream of the exclusion of exon 2  
205 from the *U2AF2* mRNA (Lalotitis et al., 2021<sup>3</sup>). Genomic instability is known to activate the  
206 cGAS/STING pathway. Rescue of the shIWS1 phenotype with U2AF65 $\alpha$  prevents the  
207 downregulation of Sororin (Lalotitis et al., 2021<sup>3</sup>) and as a result, it is expected to prevent  
208 genomic instability and the induction of the type I IFN genes. However, it is unlikely to regulate  
209 the expression of other intronless genes.

210 mRNAs sequestered in the nucleus cannot be translated. The preceding data therefore  
211 suggest that in the absence of IWS1 phosphorylation, the abundance of the proteins encoded  
212 by all four intronless genes in figure 1b would be decreased. This was addressed by probing



213 western blots of total cell lysates with antibodies to the proteins encoded by these genes. The  
214 expression of IFN $\beta$ 1 was examined in cells infected with SeV-GFP, or treated with poly (I:C),  
215 both of which induce the expression of type I IFNs, and the expression of c-JUN and HSP27  
216 was examined in uninfected cells growing under normal culture conditions. The results  
217 confirmed that shIWS1 downregulates the proteins encoded by these genes and that the  
218 downregulation is rescued as by wild type IWS1, but not by the phosphorylation site IWS1  
219 mutant, as expected (**Fig. 1e**). Importantly, the downregulation was also rescued by U2AF65 $\alpha$ ,  
220 but not U2AF65 $\beta$  (**Fig. 1e**), suggesting that it is due to the effects of the loss of IWS1  
221 phosphorylation on the alternative RNA splicing of *U2AF2*. Consistent with these findings were  
222 the results of Reverse Phase Protein Assay (RPPA) experiments in human lung  
223 adenocarcinomas, which showed that although the expression of intronless genes at the RNA  
224 level exhibits a negative correlation with the expression of IWS1, (**Fig 1d and Supplementary**  
225 **Figure 1b**), their expression at the protein level, and IWS1, exhibit a significant positive  
226 correlation (**Supplementary Figure 1c**).

227

228 **The phosphorylation of IWS1 by AKT3 is required for the nuclear export of intronless**  
229 **gene mRNAs via *U2AF2* RNA splicing.**

230 The preceding data show that the AKT-dependent phosphorylation of IWS1 is required  
231 for the nuclear export and translation of the mRNAs of naturally intronless genes via a  
232 U2AF2/Prp19-dependent pathway. This raised the question whether AKT, which  
233 phosphorylates IWS1 at Ser720/Thr721 (Sanidas et al., 2014<sup>1</sup>), is required for the activation  
234 of the pathway. To address this question, we first infected NCI-H522 and NCI-H1299 cells with  
235 SeV-GFP to induce the expression of type I IFNs. Infected cells (24 hours after the infection)  
236 and uninfected cells were then treated with 5  $\mu$ M of the AKT inhibitor MK2206, a dose that  
237 fully inhibits all AKT isoforms (Sanidas et al., 2014<sup>1</sup>, Laliotis et al., 2021<sup>3</sup>). Western blotting of  
238 cell lysates harvested 24 hours after the start of exposure to MK2206, confirmed the strong

239 inhibition of AKT and the complete block of IWS1 phosphorylation (**Fig. 2a**). Moreover, RT-  
240 PCR using RNA isolated from the same cell lysates, confirmed that AKT inhibition results in  
241 the exclusion of exon 2 from the mature *U2AF2* mRNA (**Fig. 2a**). Lysates of the same cells,  
242 before and after treatment with MK2206, were fractionated into nuclear and cytoplasmic  
243 fractions. Quantitative RT-PCR, addressing the abundance of the RNAs of *IFNA1*, *IFNB1*,  
244 *JUN* and *HSBP3* in these fractions, confirmed that the AKT activity is required for the nuclear  
245 export of the mRNAs of all four intronless genes (**Fig. 2b**). We conclude that the  
246 phosphorylation of IWS1 at Ser720/Thr721 is indeed required for the nuclear export of these  
247 mRNAs and that AKT is the main kinase responsible for the phosphorylation. Probing western  
248 blots of total cell lysates of the same cells with antibodies to c-JUN, phosphor-c-JUN (Ser73),  
249 HSP27 and IFN $\beta$ , revealed that their abundance is dramatically downregulated following AKT  
250 inhibition, as expected (**Fig. 2c**).

251 To determine whether it is the AKT3 isoform, which is responsible for the observed  
252 effects of AKT on RNA transport and translation, we transduced NCI-H522 and NCI-H1299  
253 cells with shAKT3 or shControl lentiviral constructs. Following confirmation of the AKT3  
254 knockdown (**Fig. 2d**), the cells were infected with SeV-GFP. Measuring the abundance of the  
255 *IFNA1* and *IFNB1* mRNAs in the two fractions of the infected cells and the *JUN* and *HSBP3*  
256 mRNAs in the two fractions of the non-infected cells, confirmed that the knockdown of AKT3  
257 profoundly inhibits the nuclear export of these mRNAs (**Fig. 2e**). Western blotting of total  
258 lysates of the same cells confirmed that the knockdown of AKT3 is sufficient to significantly  
259 lower the abundance of the proteins encoded by these mRNAs (**Fig. 2f**), as expected. We  
260 conclude that AKT3 is the main kinase responsible for the phosphorylation of IWS1 at  
261 Ser720/Thr721.

262 **IWS1 phosphorylation drives the recruitment of Prp19 to mRNA CAR-Elements, by**  
263 **promoting the inclusion of exon 2 in the mature *U2AF2* mRNA transcripts.**

264 Previous studies had shown that the nuclear export of the mRNA of intronless genes  
265 depends on the recruitment of U2AF65 and Prp19 to CAR-Elements (Lei et al., 2013<sup>4</sup>). In  
266 addition, they had shown that U2AF65 interacts directly with Prp19 via its exon 2-encoded RS  
267 domain (Laliotis et al., 2021<sup>3</sup>, David et al., 2010<sup>27</sup>), suggesting that the recruitment of Prp19 to  
268 these complexes may depend on the alternative splicing of *U2AF2*. Based on these  
269 considerations, we reasoned that the IWS1 phosphorylation-dependent inclusion of exon 2 in  
270 the *U2AF2* mRNA, might promote the nuclear export of these mRNAs by regulating the  
271 recruitment of Prp19 to CAR-Elements. This hypothesis was addressed by RNA  
272 Immunoprecipitation (RIP) with anti-U2AF65 and anti-Prp19 antibodies in shControl, shIWS1,  
273 shIWS1/WT-R, shIWS1/MT-R, shIWS1/U2AF65 $\alpha$  and shIWS1/U2AF65 $\beta$  NCI-H522 and NCI-  
274 H1299 cells. Immunoprecipitated RNA was detected by qRT-PCR, using sets of primers  
275 designed to amplify the CAR-Elements or control regions of the *IFNA1*, *IFNB1*, *JUN* and  
276 *HSPB3* mRNAs (**Supplementary Figure 2a**). The results showed that whereas neither of the  
277 U2AF65 splice variants binds the control sequences, both bind the CAR-Elements with equal  
278 efficiency (**Fig. 3a, 3b upper panels**). However, Prp19 binding to the same CAR-Elements,  
279 was significantly impaired in shIWS1 and shIWS1/MT-R cells, which predominantly express  
280 the RS domain-deficient U2AF65 $\beta$  isoform (**Fig. 3a lower panels**). More important, the  
281 impaired Prp19 binding to the CAR-Elements was rescued by U2AF65 $\alpha$ , but not U2AF65 $\beta$   
282 (**Fig. 3a, 3b lower panels**). We conclude that the recruitment of Prp19 to the CAR-Element-  
283 associated complexes and the nuclear export of the mRNA of CAR-Element-containing  
284 intronless genes, is regulated by IWS1 phosphorylation via the alternative RNA splicing of  
285 *U2AF2*.

286 The preceding data raised the question whether the expression and phosphorylation  
287 of IWS1 regulates the nuclear export of the mRNAs of CAR-Element-containing intronless  
288 genes in human cancer. To address this question, we used qRT-PCR to measure the  
289 abundance of the *IFNA1*, *IFNB1*, *JUN* and *HSPB3* mRNAs in nuclear and cytoplasmic  
290 fractions of tumor cell lysates of three lung adenocarcinomas expressing high and three  
291 expressing low levels of IWS1/p-IWS1 (**Fig. 3c Upper panel**). The results confirmed that the

292 Cytoplasmic/Nuclear ratio of the RNAs transcribed from the *IFNA1*, *IFNB1*, *JUN* and *HSPB3*  
293 genes in Human Lung Adenocarcinomas, correlates with the expression and phosphorylation  
294 of IWS1 and with the inclusion of exon 2 in the mature *U2AF2* mRNA (**Fig. 3c Lower panel**).  
295 Next, we carried out RIP assays for U2AF65 and Prp19, using total cell lysates of the same  
296 lung adenocarcinomas. The results confirmed that whereas U2AF65 binds equally well the  
297 CAR-Elements in the mRNAs of all four genes in both the high and the low p-IWS1 tumors,  
298 Prp19 binds efficiently the CAR-Elements of these mRNAs only in the high p-IWS1 tumors.  
299 Given that the predominant U2AF65 isoform in high p-IWS1 tumors is the U2AF65 $\alpha$  isoform,  
300 which binds Prp19, while the predominant isoform in the low p-IWS1 tumors is U2AF65 $\beta$ ,  
301 which does not interact with Prp19, these data indicate that in lung adenocarcinoma patients,  
302 as in cultured tumor cells, the recruitment of Prp19 to the CAR-Elements is mediated by  
303 U2AF65. We conclude that the IWS1 phosphorylation-dependent pathway regulating the  
304 nuclear export of RNAs transcribed from CAR-Element-containing intronless genes, is active  
305 in human lung adenocarcinomas.

306

307 **The RNA Pol II promoter of type I IFN genes, plays an essential role in the IWS1**  
308 **phosphorylation-dependent mRNA nuclear export.**

309 Earlier studies had shown that U2AF65 binds RNA Pol II and recruits Prp19. During  
310 transcriptional elongation, both U2AF65 and Prp19 are loaded to the newly synthesized pre-  
311 mRNA, promoting RNA splicing co-transcriptionally (David et. al., 2011<sup>27</sup>). This suggested that  
312 U2AF65 and Prp19 might be loaded to the CAR-Elements of the RNAs transcribed from  
313 naturally intronless genes, via a similar mechanism. To address this hypothesis, we expressed  
314 *IFNA1* and *IFNB1* from RNA Pol II, or RNA Pol III constructs and we asked whether the  
315 mRNAs transcribed from the two different promoters are transported to the cytoplasm with  
316 equal efficiency. We reasoned that if U2AF65 and Prp19 are loaded to the CAR-Elements by  
317 RNA Pol II during transcriptional elongation, they will probably fail to load to the RNA Pol III  
318 transcripts, because U2AF65 and Prp19 do not bind RNA Pol III. As a result, RNA Pol III  
319 transcripts will stay in the nucleus, and they will not be translated into protein. To carry out this

320 experiment, we cloned the *IFNA1* and *IFNB1* cDNAs in the lentiviral vectors pLx304 and  
321 pLKO.1, which drive expression through CMV (RNA Pol II-dependent) or U6 (RNA Pol III-  
322 dependent) promoters, respectively (Schramm et al., 2002<sup>28</sup>) (**Supplementary Figure 3a**).  
323 We then transduced NCI-H522 and NCI-H1299 cells with shIFNA1 or shIFNB1 *lentiviral*  
324 constructs, and we rescued the *IFNA1* and *IFNB1* knockdown with the RNA Pol II-driven  
325 (pLx304-R) or RNA Pol III-driven (pLKO.1-R) lentiviral constructs of these genes. Following  
326 this, the cells were infected with SeV-GFP and the expression of *IFNA1* or *IFNB1* was  
327 measured by qRT-PCR, 24 hours later. The results showed that *IFNA1* or *IFNB1* were  
328 transcribed efficiently from both the RNA Pol II and the RNA Pol III promoters (**Fig. 4a Upper**  
329 **panel**). However, measuring the abundance of the *IFNA1* or *IFNB1* mRNAs in the nuclear and  
330 cytoplasmic fractions of the same cells by qRT-PCR, revealed that only the mRNAs  
331 transcribed from the RNA Pol II promoter were efficiently transported to the cytoplasm (**Fig.**  
332 **4a Lower panel**). Western blots of total cell lysates from the *IFNB1*-transduced NCI-H522 and  
333 NCI-H1299 cells, confirmed that only the cells rescued with the RNA Pol II construct  
334 (pLx304IFN $\beta$ ) express IFN $\beta$  (**Fig. 4b**). We interpret these data to suggest that U2AF65 and  
335 Prp19, which bind RNA Pol II but not RNA Pol III, are likely loaded to the CAR-Elements co-  
336 transcriptionally via RNA Pol II, and that the co-transcriptional RNA loading of these molecules'  
337 controls mRNA nuclear export and translation.

338 **The IWS1 phosphorylation-dependent *U2AF2* alternative RNA splicing is required for**  
339 **the RNA nuclear export function of the Cytoplasmic Accumulation Region Elements**  
340 **(CAR-E).**

341 The preceding data suggest that the nuclear export of the mRNAs of CAR-E-positive  
342 intronless genes, depends on IWS1 phosphorylation by AKT, which regulates the loading of  
343 U2AF65/Prp19 complexes to CAR-Elements in these mRNAs. To confirm that IWS1  
344 phosphorylation and *U2AF2* alternative RNA splicing regulate CAR-E function, we employed  
345 previously described pCMV promoter  $\beta$ -globin constructs, in which 16 tandem copies of the  
346 most conserved CAR-Element (CCAGTTCCTG element of *JUN*) or its mutated inactive

347 version (CAR-E<sub>mut</sub>), were inserted in the 5' UTR of the  $\beta$ -globin cDNA (**Fig. 3a**) (Lei et al.,  
348 2013<sup>4</sup>). As controls, we used a pCMV promoter /  $\beta$ -globin cDNA construct and a pCMV  
349 promoter /  $\beta$ -globin gene construct. All constructs were transiently transfected in shControl,  
350 shIWS1, shIWS1/WT-R, shIWS1/MT-R, shIWS1/U2AF65 $\alpha$ -R, and shIWS1/U2AF65 $\beta$ -R NCI-  
351 H522 and NCI-H1299 cells and the expression of globin in the transfected cells was monitored  
352 by Western blotting. Earlier studies had shown that whereas the  $\beta$ -globin mRNA transcribed  
353 from the wild type  $\beta$ -globin gene, efficiently accumulates in the cytoplasm, the  $\beta$ -globin mRNA  
354 transcribed from the cDNA, is degraded in the nucleus (Dias et al., 2010<sup>29</sup>, Lei et al., 2011<sup>30</sup>,  
355 Valencia et al., 2008<sup>31</sup>). In agreement with the results of these studies, our data showed that  
356 whereas shControl cells transduced with the cDNA construct do not express  $\beta$ -globin,  
357 shControl cells transduced with the wild type  $\beta$ -globin gene construct, do (**Fig. 5b**,  
358 **Supplementary Figure 4**). More important, the failure of the cDNA construct to direct the  
359 expression of  $\beta$ -globin was rescued with the insertion of the array of wild type, but not the  
360 mutant CAR-Elements in its 5' UTR (**Fig. 5b, Supplementary Figure 4 upper panels**). Since  
361 expression of the  $\beta$ -globin gene depends on the ability of its mRNA to exit the nucleus, the  
362 data in shControl cells, confirm the earlier observations on the function of CAR-Elements. The  
363 experiment in shIWS1, shIWS1/WT-R and shIWS1/MT-R cells showed the CAR-Element  
364 array is not functional in shIWS1 cells and that whereas rescue with wild type IWS1 restores  
365 its function, rescue with the phosphorylation site mutant of IWS1 does not (**Fig. 5b**,  
366 **Supplementary Figure 4 upper and middle panes**). Moreover, the shIWS1 induced defect  
367 in the CAR-Element function was rescued by the RS domain-containing U2AF65 $\alpha$ , but not by  
368 the RS domain-deficient U2AF65 $\beta$  (**Fig. 5b, Supplementary Figure 4 lower panels**). We  
369 conclude that the function of the CAR-Elements depends on IWS1 phosphorylation, which  
370 controls the function of the CAR-Elements, by regulating the alternative splicing of *U2AF2*.  
371  
372 **The low expression of type I IFNs in shIWS1 and shIWS1/MT-R cells enhances their**  
373 **sensitivity to viral infection.**

374 Type I IFNs regulate innate and adaptive immunity and orchestrate the cellular antiviral  
375 response (Lazear et al., 2019<sup>32</sup>). Cells failing to induce type I IFNs in response to viral infection  
376 and cells, which fail to respond to type I IFNs are more sensitive to infection. Given that the  
377 IWS1 phosphorylation-dependent alternative RNA splicing of *U2AF2* regulates the nuclear  
378 export and translation of type I IFN genes, we hypothesized that cells in which IWS1 was  
379 knocked down and cells in which the IWS1 knockdown was rescued with the phosphorylation  
380 site mutant of IWS1 will be more sensitive to viral infection. To address this hypothesis, we  
381 infected shControl, shIWS1, shIWS1/WT-R and shIWS1/MT-R NCI-H522 and NCI-H1299  
382 cells with Vesicular Stomatitis Virus (MOI=0.5) or Influenza A virus (MOI=0.5), engineered to  
383 express GFP (VSV-GFP and IAV-GFP). NCI-H522 cells, but not NCI-H1299 cells, were also  
384 infected with the Reovirus (MOI=1). Finally, shControl and shIWS1 NCI-H522 and NCI-H1299  
385 cells were infected with GFP-expressing Sendai virus (SeV-GFP) (MOI=0.5). Twenty four  
386 hours later, cells were harvested and the percentage of infected cells was determined by flow  
387 cytometry (Chesarino et al., 2015<sup>33</sup>, Kenney et al., 2019<sup>34</sup>, Sermersheim et al., 2020<sup>35</sup>). The  
388 results showed that the percentage of infected cells with all four viruses was higher in shIWS1  
389 than in shControl cells and that the shIWS1 phenotype was rescued with WT IWS1  
390 (shIWS1/WT-R cells), but not with the phosphorylation site mutant of IWS1 (shIWS1/MT-R  
391 cells), as expected (**Fig. 6a, Supplementary Figure 5a**). To assess viral replication changes  
392 in the shIWS1 and shIWS1/MT-R NCI-H522 and NCI-H1299 cells, we employed qRT-PCR,  
393 using the viral oligonucleotide primers listed in the methods section. The results showed that  
394 the knockdown of IWS1, and its rescue with the phosphorylation site IWS1 mutant, resulted in  
395 a significant increase of the abundance of replicating viral genomes in virus-infected cells (**Fig.**  
396 **6a Right panels, Supplementary Figure 5a, Supplementary Data 2**). These results  
397 confirmed that the loss of phosphorylated IWS1 increases the sensitivity of the cells to virus  
398 infection and they were fully consistent with the results of the flow-cytometry experiments. The  
399 IWS1 knockdown in the experiments in this section was carried out with a short hairpin RNA  
400 constructs in a pGIPZ vector, we modified by deleting the GFP cassette, as described in the  
401 methods section.

402 The data presented in this report collectively suggest that the increased sensitivity of  
403 shIWS1 and shIWS1/MT-R cells to viral infection, is due to the impaired induction of type I  
404 IFNs. To address this question, we infected shControl shIWS1, shIWS1/WT-R and  
405 shIWS1/MT-R NCI-H522 cells with VSV-GFP. Sixteen hours later, the cells and their culture  
406 supernatants were harvested (**Fig. 6b**). Quantitative RT-PCR addressing the abundance of a  
407 set of IFN-stimulated genes (ISGs) in RNA isolated from lysates of these cells, revealed robust  
408 induction in shControl, but not in shIWS1 cells. Moreover, the defect in ISG induction in  
409 shIWS1 cells was rescued by wild type IWS1, but not by the phosphorylation site IWS1 mutant  
410 (**Fig. 6c**). These findings and the results of the preceding experiments are in full agreement,  
411 and they collectively suggest that IWS1 phosphorylation is required for the induction of type I  
412 IFNs in virus-infected cells.

413 To confirm the failure of VSV-GFP to induce biologically active type I IFNs in IWS1  
414 knockdown cells, we used the culture supernatants harvested from shControl and shIWS1  
415 NCI-H522 cells to stimulate naïve NCI-H522 parental cells (**Fig. 6b**). Immunoblotting of protein  
416 lysates harvested at multiple time points from the start of the stimulation, revealed rapid robust  
417 phosphorylation of STAT1 (Y701) and rapid increase in the expression of IFN $\beta$ 1 in the lysates  
418 of cells stimulated with the shControl, but not the shIWS1 culture supernatants (**Fig. 6d Upper**  
419 **panel**). The phosphorylation of STAT1, a known target of type I IFNs, combined with the data  
420 in figure 5c, further support the selective induction of type I IFNs in virus-infected, IWS1  
421 phosphorylation proficient cells. The increase in the abundance of IFN $\beta$ 1, within 10 minutes  
422 from the start of the stimulation, was surprising because it was too rapid to be due by the  
423 induction of the *IFNB1* gene. Previous studies had shown that IFN $\beta$ 1 undergoes endocytosis  
424 and that it can be siloed in endosomes, where it can be detected for days following IFN  
425 treatment (Altman et al., 2020<sup>34</sup>). Based on this information, we hypothesized that IFN $\beta$ 1  
426 detected in this experiment was endocytosed from the culture supernatants of shControl cells.  
427 To address this hypothesis, we treated the parental NCI-H522 cells with recombinant human  
428 IFN $\beta$ 1, and we probed the cell lysates harvested at sequential time points from the start of the



429 treatment with antibodies to IFN $\beta$ 1. The results confirmed the rapid accumulation of the  
430 recombinant IFN $\beta$ 1 in the harvested cell lysates (**Supplementary Figure 5c**).

431 Phosphorylated STAT1 and STAT2, in combination with IRF9, form a trimeric complex  
432 known as Interferon Stimulated Gene Factor 3 (ISGF3), which is required for the induction of  
433 ISGs. This suggests that the phosphorylation of STAT1 in cells treated with the culture  
434 supernatants of VSV-GFP-infected shControl NCI-H522 cells is critical for the induction of type  
435 I IFNs. To determine whether the phosphorylated STAT1 indeed contributes to ISG induction  
436 in these cells (Wang et al., 2017<sup>35</sup>), we performed Chromatin ImmunoCleavage (ChIC) assays  
437 in NCI-H522 cells in the upper panel, harvested at 30 minutes from the start of the stimulation.  
438 Unstimulated cells were used as controls. Consistent with the STAT1 phosphorylation pattern,  
439 the results showed increased binding of p-STAT1 (Y701) to the ISREs of the ISGs *IRF1*, *IRF9*,  
440 *STAT1*, and *STAT2*, only in cells stimulated with the culture supernatants of the VSV-GFP-  
441 infected shControl cells (**Fig. 6d, lower panel**).

442 If the phosphorylation of IWS1 by AKT3 is required for the induction of type I IFNs, as  
443 the data presented in this report indicate, inhibition of AKT prior to viral infection should block  
444 the induction of ISGs. To address this hypothesis, we treated NCI-H522 cells with 5  $\mu$ M  
445 MK2206, or with the vehicle (DMSO). 4 hours later, cells were infected with VSV-GFP  
446 (MOI=1), and they were harvested 16 hours later. Using RNA isolated from the harvested cell  
447 lysates and qRT-PCR, we examined the expression of the same set of 20 ISGs as in the  
448 experiment in figure 5C. The results confirmed that AKT inhibition, similarly to the knockdown  
449 of IWS1 blocks the induction of ISGs in virus-infected cells (**Supplementary Figure 5c**), as  
450 expected. These data collectively show that by regulating the expression of type I IFNs, IWS1  
451 phosphorylation by AKT enhances the resistance to viral infection

452 **Inhibition of the AKT/p-IWS1 axis sensitizes lung adenocarcinoma cells to cytolytic**  
453 **virus-induced apoptotic cell death.**

454 Data presented in this report show that the knockdown of IWS1 or the inhibition of its  
455 phosphorylation, interferes with the expression of type I IFNs by virus-infected cells and

456 enhances the sensitivity of the cells to viral infection. Given that infection by cytolytic viruses  
457 induces cell death, infection of human tumors with engineered strains of “oncolytic viruses”  
458 emerged in recent years as a new therapeutic tool in Oncology. Such viruses not only kill  
459 tumor cells, but they also alter the relative abundance and function of different types of immune  
460 cells in the tumor microenvironment. As a result, they can be effective either as a  
461 monotherapy, or in combination with other anti-cancer therapeutics.

462 Variants of two of the viruses we used in the preceding experiments, VSV-GFP and  
463 Reovirus, are evaluated as potential virotherapy agents in a variety of solid tumors, including  
464 lung cancer (Schreiber et al., 2019<sup>38</sup>, Villalona-Calero et al., 2016<sup>39</sup>). We therefore tested  
465 whether inhibition of the AKT/p-IWS1 axis enhances their cytolytic activity against tumor cells.  
466 In addition, we examined the mechanism by which they induce cell death. To address these  
467 questions, we first infected shControl, shIWS1, shIWS1/WT-R, and shIWS1/MT-R NCI-H522  
468 and NCI-H1299 cells, with VSV-GFP or Reovirus, at logarithmically increasing multiplicities of  
469 infection (MOI), and we monitored the percentage of surviving cells at 16 hours (VSV-GFP) or  
470 at 48 hours (Reovirus) after infection. The results revealed that both the knockdown of IWS1  
471 and its rescue with the phosphorylation site IWS1 mutant, dramatically enhance cell death by  
472 both VSV-GFP and Reovirus (**Fig. 7a, Supplementary Figure 7a**). A repeat of the experiment  
473 in naive parental NCI-H522 and NCI-H1299 cells, pretreated with the AKT inhibitor MK2206,  
474 gave similar results (**Fig. 7b, Supplementary Figure 7b**), as expected. We conclude that  
475 blocking the IWS1 phosphorylation pathway by inhibiting AKT, can be used as a tool to  
476 increase the killing efficiency of oncolytic viruses.

477 To address the mechanism of cell death following infection with cytolytic viruses, we  
478 infected shControl and shIWS1 NCI-H522 and NCI-H1299 cells with VSV-GFP (MOI=1). Cells  
479 were harvested before and at different time points from the start of the infection and the  
480 cleavage of PARP along with the abundance of IWS1 was monitored in the cell lysates by  
481 Western blotting. The results showed a dramatic upregulation of cleaved PARP in the lysates  
482 of the shIWS1 cells, starting at 2 hours (NCI-H522 cells) or 6 hours (NCI-H1299 cells) from  
483 the start of the infection (**Fig. 7c, Supplementary Figure 7c**). Given that the cleavage of

484 PARP, is a hallmark of Caspase-mediated cell death (Chaitanya et al., 2010<sup>40</sup>), we conclude  
485 that cell death induced by these **cytolytic** viruses is due to caspase activation-induced  
486 apoptosis.

487

488 **Model of the pathway by which the AKT3/IWS1/U2AF2 axis promotes nuclear export of**  
489 **CAR-Element-containing intronless gene mRNAs, and resistance to viral infection.**

490 The phosphorylation of IWS1 at S720/T721 by AKT controls the epigenetic regulation  
491 of the alternative RNA splicing of *U2AF2*, promoting the inclusion of exon 2 in the mature  
492 *U2AF2* mRNA. The RS domain-containing *U2AF65 $\alpha$*  isoform encoded by the exon 2  
493 containing *U2AF2* mRNA, binds CAR-Elements in the mRNA of type I IFN, and other  
494 intronless genes, and recruits Prp19. The *U2AF65/Prp19* complex assembled on the CAR-  
495 Elements is required for the nuclear export and translation of these mRNAs. Overall, IWS1  
496 expression and phosphorylation by AKT, promotes the expression of intronless genes,  
497 including type I IFNs and increases the resistance of the cells to infection by cytolytic viruses  
498 (Fig. 8).

499 **Discussion**

500 Data presented in this report show that a pathway initiated by the AKT3-mediated  
501 phosphorylation of IWS1 promotes the nucleocytoplasmic export of the mRNAs of a set of  
502 intronless genes and controls the expression of the proteins encoded by these mRNAs. Genes  
503 regulated by this pathway include the type I IFN-encoding genes *IFNA1* and *IFNB*. Inhibition  
504 of the pathway by knocking down IWS1, or by rescuing the IWS1 knockdown with the IWS1  
505 mutant IWS1-S720A/T721A, resulted in low expression of type I IFNs and in cellular  
506 sensitization to viral infection and replication and virus-induced, caspase-mediated cell death.  
507 As expected, inhibition of the pathway sensitized the cells to a broad array of viruses, including  
508 Vesicular Stomatitis Virus (VSV), Influenza virus, Sendai virus and Reovirus. In addition to the  
509 type I IFN genes, other genes also regulated by this mechanism, include *JUN* and the HSP27-  
510 encoding *HSBP3*.

511 The rationale of the experiments linking the IWS1 phosphorylation pathway to the  
512 nucleocytoplasmic export of the mRNAs of intronless genes and the sensitization to viral  
513 infection, was based on the integration of two earlier observations. First, it had been shown  
514 that the mRNAs of the majority of naturally intronless genes, including type I IFNs, *JUN* and  
515 *HSPB3*, contain 10 nucleotide consensus CAR-Elements, which provide the docking site for  
516 the assembly of nucleocytoplasmic export complexes, containing members of the TREX  
517 complex, U2AF65 and Prp19. Second, we had shown previously that IWS1 phosphorylation  
518 by AKT3 promotes transcription-coupled chromatin modifications, which regulate the  
519 alternative RNA splicing of *U2AF2*. The predominant *U2AF2* transcript in the absence of IWS1  
520 phosphorylation, is exon 2-deficient. Given that *U2AF2* exon 2 encodes the RS domain of  
521 U2AF65, which is the domain of interaction between U2AF65 and Prp19, we hypothesized  
522 that in the absence of phosphorylated IWS1, the interaction between U2AF65 and Prp19  
523 would be impaired, and this would affect the binding of Prp19 to CAR-Elements in naturally  
524 intronless mRNAs. In addition, if this interaction plays a critical role in the nucleocytoplasmic  
525 export of the mRNAs of intronless genes harboring CAR-Elements, the partial loss of  
526 phosphorylated IWS1 would also impair the nuclear export of these mRNAs. The data in this  
527 report fully support this hypothesis.

528 In the experiments presented in this report, we show that the RS domain-deficient  
529 U2AF65 $\beta$ , which is encoded by exon 2-deficient *U2AF2*, continues to bind the CAR-Elements  
530 in the mRNAs of type I IFNs. However, Prp19, whose recruitment is required for the nuclear  
531 export of these mRNAs (Lei et al., 2013<sup>4</sup>), failed to bind RNA CAR-Elements in cells  
532 expressing U2AF65 $\beta$ , indicating that its recruitment to these elements depends on its  
533 interaction with U2AF65 $\alpha$ . These findings strongly suggest that the IWS1  
534 phosphorylation-dependent alternative RNA splicing of *U2AF2* is a direct regulator of  
535 the nuclear export phenotype of the mRNAs of CAR-E-positive intronless genes.  
536 These findings make it unlikely that the RNA nuclear export phenotype is due to  
537 secondary effects of IWS1 on RNA splicing.

538           Given that the recruitment of the TREX complex to CAR-Elements is U2AF65  
539 independent (Lei et al., 2013<sup>4</sup>), the changing pattern of *U2AF2* mRNA splicing in cells deficient  
540 in phosphorylated IWS1, should only affect the binding of Prp19, which should be responsible  
541 for the defective nuclear export of intronless CAR-Element-containing mRNAs in these cells.  
542 Prp19 may ultimately be affecting the composition and/or the functionality of the complex. The  
543 exact mechanism by which it is regulating the nuclear export of this class of mRNAs will be  
544 addressed in future studies.

545           The loading of the TREX complex to RNA is co-transcriptional (Sträßer et al., 2002<sup>41</sup>),  
546 RNA Pol II-dependent and RNA splicing independent and as a result, it contributes to the  
547 nuclear export of the mRNA of naturally intronless genes. To address the mechanism of  
548 U2AF65 and Prp19 loading to the RNAs of naturally intronless genes we hypothesized that  
549 U2AF65 is also loaded co-transcriptionally and, given that U2AF65 binds RNA Pol II, its  
550 loading may also be RNA Pol II-dependent. We therefore placed *IFNB1* under the control of  
551 an RNA Pol III promoter, and we examined its expression at the RNA and protein levels. The  
552 results showed that although RNA Pol III efficiently transcribed *IFNB1*, mRNA transcribed from  
553 the RNA Pol III promoter was not exported efficiently from the nucleus, and failed to be  
554 translated, as evidenced by the fact that the expression of *IFNB1* at the protein level did not  
555 parallel its expression at the RNA level. Given that RNA Pol III is not known to bind U2AF65,  
556 we interpret these data to suggest that the loading of the U2AF65/Prp19 complex to CAR-  
557 Elements in the mRNA of naturally intronless genes is also co-transcriptional and RNA Pol II-  
558 dependent.

559           In the preceding paragraphs we pointed out that the downregulation of IWS1 and the  
560 block of IWS1 phosphorylation inhibit the expression of intronless genes that harbor CAR-  
561 Elements, because IWS1 phosphorylation is required for the nuclear export and translation of  
562 their mRNAs. However, the abundance of RNA transcripts of these genes is increased,  
563 perhaps because of a feedback mechanism activated by sensing the downregulation of their  
564 protein products. This finding is also in agreement with the RNA-Seq data of lung  
565 adenocarcinoma patients in the TCGA database, which show that the expression of IWS1

566 exhibits a negative correlation with the expression of type I IFN genes. A potential mechanism  
567 by which AKT inhibition may promote the transcriptional activation of type I IFNs was  
568 suggested by recent studies showing that AKT phosphorylates the human cyclic GMP-AMP  
569 synthase (cGAS) on Ser305, inhibiting its activity and the induction of type I IFNs (Seo et al.,  
570 2015<sup>42</sup>). If inhibition of AKT induces partial G2/M arrest and genomic instability, as suggested  
571 by our earlier studies, it would also activate the cGAS/STING pathway and the transcriptional  
572 activation of the type I IFN genes and this may be facilitated by the absence of cGAS  
573 phosphorylation. An apparent paradox in these data is the observation that despite the  
574 downregulation of expression of type I IFNs at the protein level in cells with low abundance of  
575 phosphorylated IWS1, the expression of a set of IFN-stimulated genes (ISGs) is increased.  
576 We propose here that the paradox is due to the PRR-mediated activation of IRF3 and NF- $\kappa$ B,  
577 which promote the expression of IFN-independent ISGs.

578 AKT kinase may regulate the expression of and the response to type I IFNs by multiple  
579 mechanisms. Specifically, it may stimulate the expression of ISGs by promoting the translation  
580 of their mRNAs downstream of mTOR activation. In addition, AKT1 may stimulate the  
581 expression of *IFNB* downstream of  $\beta$ -catenin phosphorylation and the expression of ISGs via  
582 phosphorylation of EMSY, which relieves the EMSY-mediated ISG repression (Ezell et al.,  
583 2012<sup>20</sup>). Moreover, a recent report provided evidence that AKT may be activated in Reovirus-  
584 infected cells via Clathrin-mediated endocytosis and that this activates the PI3K/AKT1/EMSY  
585 pathway and inhibits viral replication (Tian et al., 2015<sup>43</sup>). The data in this report identify yet  
586 another pathway by which AKT1 and AKT3 regulates the IFN response and the sensitivity to  
587 viral infection and replication. The fact that the selective inhibition of some of these pathways,  
588 such as the EMSY or the IWS1 pathway, had profound effects on the sensitivity of the cells to  
589 viral infection, suggests that these pathways may not function independently of each other  
590 and that their roles may not be additive, but synergistic. The potential crosstalk between these  
591 AKT-regulated pathways will be addressed in future studies.

592 The data in this report may have significant implications in cancer treatment. First and  
593 foremost, they show that inhibition of the IWS1 phosphorylation pathway enhances the

594 sensitivity to viral infection and replication and promotes virus-induced, caspase-mediated  
595 apoptosis. We interpret these data to suggest that inhibition of the pathway will enhance the  
596 therapeutic potential of oncolytic viruses. Oncolytic viruses may have direct anti-tumor activity,  
597 because of their ability to kill tumor cells, which tend to be more sensitive to viral infection than  
598 normal cells (Xia et al., 2016<sup>44</sup>, Bommareddy et al., 2018<sup>45</sup>). In addition, they may modulate  
599 innate immunity in the tumor microenvironment, enhancing the anti-tumor immune response,  
600 or the anti-tumor effects of cancer immunotherapies. For example, intratumoral reovirus  
601 administration enhanced the effects of PD-1 blockade in mice inoculated subcutaneously with  
602 B16 melanoma cells, by promoting tumor infiltration with CD8<sup>+</sup>T cells and by increasing the  
603 ability of NK cells to kill reovirus-infected tumor cells (Rajani et al., 2016<sup>46</sup>). Immunomodulation  
604 by oncolytic viruses may be enhanced by using viruses engineered to deliver  
605 immunomodulatory molecules to the tumor microenvironment. For example, the first approved  
606 oncolytic virus TVEC, is an HSV1, which was genetically modified to express GM-CSF  
607 (Rehman et al., 2016<sup>16</sup>). Another HSV-based oncolytic virus oHSV G47 $\Delta$ , engineered to  
608 deliver IL-12, induced long-term durable cures in two syngeneic mouse models of GBM, when  
609 combined with anti-CTLA-4 and anti-PD-1 treatment. Anti-tumor effects were mediated by a  
610 profound increase in the ratio of T effector to Tregs in the tumor microenvironment (Saha et  
611 al., 2017<sup>47</sup>). Multiple clinical trials addressing the effectiveness of oncolytic viruses or  
612 combinations of oncolytic viruses with immunomodulatory treatments are currently in progress  
613 with promising results, in patients with lung cancer (NCT03029871, NCT00861627)  
614 (NCT02263508, NCT02307149, NCT03153085) (Bishnoi et al., 2018<sup>48</sup>). Based on the data  
615 presented in this report, we propose that all oncolytic virus-based anticancer treatments could  
616 potentially benefit by the inhibition of the IWS1 phosphorylation pathway.

617 The data in this report may also be relevant for the design of strategies to prevent or  
618 overcome the resistance of EGFR mutant lung adenocarcinomas to EGFR inhibitors. Our  
619 earlier studies had shown that the IWS1 phosphorylation pathway is active in human lung  
620 adenocarcinomas (Sanidas et al., 2014<sup>1</sup>, Lalotitis et al., 2021<sup>3</sup>). Moreover, IWS1  
621 phosphorylation and exon 2 inclusion in the *U2AF2* mRNA were shown to correlate positively

622 with tumor stage, histologic grade, and metastasis, and to predict poor survival in patients with  
623 *EGFR* mutant, but not *KRAS* mutant tumors. More important, a recent publication provided  
624 evidence, linking resistance to *EGFR* inhibitors to the upregulation of type I IFN signaling  
625 (Gong et al., 2020<sup>49</sup>). This suggests that by promoting IFN signaling, the IWS1 phosphorylation  
626 pathway may promote resistance to *EGFR* inhibitors, contributing to the poor prognosis of  
627 these tumors. Inhibition of the IWS1 phosphorylation pathway for all the preceding anti-cancer  
628 applications can be achieved by inhibiting selectively AKT1 and AKT3, by blocking the  
629 interaction between phosphorylated IWS1 and SETD2 and by using antisense  
630 oligonucleotides or pharmacologic modulators of the splicing machinery (Obeng et al., 2019<sup>50</sup>),  
631 to modulate the alternative RNA splicing of *U2AF2*.

632 In conclusion, data presented in this report describe a novel pathway by which AKT  
633 regulates the nucleocytoplasmic transport of the mRNAs of intronless genes harboring CAR-  
634 Elements and the effects of this process on the translation of these mRNAs. Type I IFNs are  
635 encoded by genes that belong to this gene set. By regulating their expression via this pathway,  
636 AKT regulates the sensitivity of the cells to viral infection and replication. The data presented  
637 in this report, may have significant implications in cancer therapeutics.



## 638 **Methods**

### 639 **Cells, culture conditions, stimulation and inhibitors**

640 NCI-H522, NCI-H1299 cells were grown in RPMI-1640 medium (Sigma-Millipore, Cat No.  
641 D8758). HEK-293T cells were grown in Dulbecco's modified Eagle's medium (Sigma-Millipore,  
642 Cat No. D5796). Both types of media were supplemented with penicillin and streptomycin  
643 (Corning, Cat No. 30-002-CI), nonessential amino acids (Corning, Cat No. 25-025-CI),  
644 glutamine (Corning, Cat No. 25-005-CI), plasmocin 2.5ng/ $\mu$ L (Invivogen, Cat No. ant-mpp)  
645 and 10% fetal bovine serum. Cells were used for up to 5 passages. The human NCI-H522  
646 non-small cell lung cancer adenocarcinoma cell line originated from an NCI-60 cell line panel  
647 obtained from Daniel Haber at Massachusetts General Hospital. The NCI-H1299 non-small  
648 cell lung cancer adenocarcinoma cell line originated from Dr Carbone's Lab at the Ohio State  
649 University. The HEK-293T human embryonic kidney cell line originated from Richard Van  
650 Etten's laboratory at Tufts Molecular Oncology Research Institute. The MDCK, HeLa and Vero  
651 cells were purchased from American Type Culture Collection (ATCC) (Cat No. CCL-34, CCL2  
652 and CCL81 respectively). Cell lines were also periodically checked for mycoplasma, using the  
653 PCR mycoplasma detection kit (ABM, Cat No. G238). All experiments were carried out in  
654 mycoplasma-free cultures. To inhibit AKT, cells growing in complete media were treated with  
655 the AKT inhibitor MK2206 (MERCK) (5  $\mu$ M) for 4 hours. At this concentration, MK2206 inhibits  
656 all three AKT isoforms. For stimulation of NCI-H522 and NCI-H1299 cells, 1000 $\mu$ g/mL hIFN $\beta$ 1  
657 (Bio-Rad Cat No. OBT1547) was used. For adequate expression of type I IFNs, NCI-H522  
658 and NCI-H1299 cells were treated with 5  $\mu$ g/mL Poly I:C sodium salt (Cell Signaling  
659 Technologies Cat No. 61401) for 6 and 12 hours respectively.

### 660 **shRNA and Expression constructs**

661 shRNAs and expression constructs are listed in Supplementary Table 3. The pLx304 IFN $\alpha$ 1-  
662 V5 and pLx304 IFN $\beta$ 1-V5 constructs were obtained by the DNAsu Plasmid Repository (DNAsu

663 Plasmid Repository Clone : HsCD00436920 and HsCD00436917). To transfer IFN $\beta$ 1-V5 and  
664 IFN $\alpha$ 1-V5 from the pLX304 to the pLKO.1 lentiviral vector, we amplified the pLX304 inserts,  
665 using oligonucleotide primers flanked by AgeI and EcoR1 restriction endonuclease sites.  
666 Amplified DNA fragments were separated in 1% agarose gels, and they were gel-purified using  
667 the NucleoSpin Gel and PCR Clean-Up kit (M&N, Cat. No. 740609.50). Following purification,  
668 they were recombined into the AgeI-EcoRI-digested pLKO.1-TRC cloning vector (Addgene  
669 #10878), using T4 DNA ligase (ThermoFisher, Cat No EL0011). To remove the GFP cassette  
670 from the pGIPZ shIWS1 construct, we initially amplified the CMV Promoter/Enhancer region  
671 (Vector map position 2707-3385) by PCR. Following gel purification, we inserted NotI sites to  
672 the ends of the amplified DNA fragment using a PCR-based strategy, and following a second  
673 purification, we digested it with XbaI and NotI. In parallel, we treated the full pGIPZ shIWS1  
674 construct also with XbaI-NotI, to remove the DNA fragment from map position 2707 to map  
675 position 4100 and following gel purification we recombined the two DNA fragments together,  
676 using T4 DNA ligase. The pGIZP GFP vector map used to design the vector modification  
677 strategy described above, can be downloaded from :  
678 [https://www.snapgene.com/resources/plasmid-](https://www.snapgene.com/resources/plasmid-files/?set=viral_expression_and_packaging_vectors&plasmid=pGIPZ)  
679 [files/?set=viral\\_expression\\_and\\_packaging\\_vectors&plasmid=pGIPZ](https://www.snapgene.com/resources/plasmid-files/?set=viral_expression_and_packaging_vectors&plasmid=pGIPZ). The primers used for  
680 the cloning strategies described above, are listed in Supplementary Table 2. All the constructs  
681 were sequenced in the Genomics Shared Resource (GSR) of OSUCCC.  
682 [https://cancer.osu.edu/for-cancer-researchers/resources-for-cancer-researchers/shared-](https://cancer.osu.edu/for-cancer-researchers/resources-for-cancer-researchers/shared-resources/genomics)  
683 [resources/genomics](https://cancer.osu.edu/for-cancer-researchers/resources-for-cancer-researchers/shared-resources/genomics), prior to use.

## 684 **Transfections and Retroviral/Lentiviral infections**

686

687 Lentiviral constructs were also packaged in HEK-293T cells by transient co-transfection with  
688 the packaging constructs psPax2 (Addgene #12260) and pM $\Delta$ 2.G (Addgene #12259).

689 Transfections were carried out using 2x HEPES Buffered Saline (Sigma, Cat. No 51558) and  
690 CaCl<sub>2</sub> precipitation. Forty-eight hours later, culture supernatant was collected and filtered.  
691 Infections were carried out in the presence of 8 µg/ml polybrene (Sigma, Cat. No. 107689). At  
692 48 hours, cells were selected for resistance to puromycin (Gibco, Cat. No. A11138) (10 µg/mL,  
693 or blasticidin (Gibco, Cat. No A1113903) (5 µg/mL), depending on the selection marker in the  
694 vector. Cells infected with multiple constructs, were selected for infection with the first  
695 construct, prior to the next infection. Transfection of lung adenocarcinoma cell lines with the  
696 pCMV HA-β-globin constructs were carried out, using the Lipofectamine 3000 Transfection  
697 Reagent (Invitrogen, Cat. No. 13778) and Opti-MEM Reduced Serum Medium (Gibco, Cat.  
698 no. 11058021), according to the manufacturer's protocol.

#### 699 **Viruses, Virus propagation and titration**

700 Vesicular stomatitis virus (Kenney et al., 2019<sup>34</sup>), expressing GFP (VSV-GFP) was propagated  
701 and tittered in HeLa cells. Sendai virus (Kenney et al., 2019<sup>34</sup>, Sermersheim et al., 2020<sup>35</sup>),  
702 expressing GFP (SeV-GFP) was propagated in 10-day-old embryonated chicken eggs at 37°C  
703 for 40 hours and tittered on Vero cells. Influenza virus A/PR/8/1934 (H1N1) expressing GFP  
704 from promoter x (PR8-GFP) was propagated in 10-day-old embryonated chicken eggs  
705 (Charles River Laboratories) for 48 hours at 37°C and tittered in MDCK cells. Reovirus  
706 (Kenney et al., 2019<sup>34</sup>, Sermersheim et al., 2020<sup>35</sup>), was propagated in Vero cells for 16 hours  
707 and tittered also in Vero cells.

#### 708 **Virus infection and detection of infected cells by flow cytometry**

709 NCI-H522 cells were infected with VSV-GFP or SeV-GFP (MOI 0.5) and they were harvested  
710 16 hour later. Alternatively, they were infected with the Influenza A, PR8-GFP strain or the  
711 Reovirus (MOI 1.0) and they were harvested 24 hours later. NCI-H1299 cells were infected  
712 with VSV-GFP or SeV-GFP at an (MOI 0.25), or with the Influenza A, PR8-GFP strain (MOI  
713 1.0) and they were harvested 24 hours later. Harvested cells infected with VSV-GFP, SeV-

714 GFP and Influenza PR8-GFP, were fixed in 4% paraformaldehyde (Thermo Scientific),  
715 permeabilized with 0.1% Triton X-100 in PBS, and resuspended in 2% fetal bovine serum in  
716 PBS. Following permeabilization, reovirus-infected cells were stained with the T3D sigma 3  
717 anti-reovirus antibody (DSHB Cat No. 10G10), followed by staining with an anti-mouse  
718 Alexa488-conjugated secondary antibody (Thermo Scientific, A-11029). VSV, SeV and  
719 Influenza A-PR8, infection rates were measured by counting cells expressing virus-encoded  
720 GFP. Flow cytometry was performed, using a FACSCanto II cell analyzer v2.3 (BD  
721 Biosciences) ([https://www.bdbiosciences.com/eu/instruments/clinical/cell-analyzers/bd-](https://www.bdbiosciences.com/eu/instruments/clinical/cell-analyzers/bd-facsanto-ii/m/744689/overview)  
722 [facsanto-ii/m/744689/overview](https://www.bdbiosciences.com/eu/instruments/clinical/cell-analyzers/bd-facsanto-ii/m/744689/overview)). Data were analyzed using the FlowJo software v9.3.3 (DB,  
723 Ashland, OR). The gating strategy is provided in Supplementary Figure 6.

#### 724 **Analysis of viral genome**

725  
726  
727  
728 Virus-infected shControl, shIWS1, shIWS1/WT-R and shIWS/MT-R NCI-H522 and NCI-H1299  
729 cells were lysed and total RNA was extracted. Using these RNAs and virus genome specific  
730 oligonucleotide primers, we carried out qRT-PCR assays, as described in the corresponding  
731 sections. The virus-specific primers are listed in Supplementary Table 2. The sequences and  
732 genomic coordinates of the viral genes whose abundance was monitored by these assays are  
733 provided as Supplementary Data 2.

#### 734 **Subcellular Fractionation**

735  $5 \times 10^6$  cells were trypsinized, following 2 washes with ice-cold 1x PBS. The cell pellet obtained  
736 by a 5 min centrifugation at 12,000 x g, was resuspended in 1mL 1x PBS. Following this, the  
737 cells were washed twice with TD buffer (135mM NaCl, 5mM KCl, 0.7mM Na<sub>2</sub>HPO<sub>4</sub>, 25mM  
738 Tris-HCl) and then lysed using TD/1% NP-40/RVC (Ribonucleoside-Vanadyl Complex, NEB,  
739 Cat. No. S1402) in the presence of RNaseOUT™ Recombinant Ribonuclease Inhibitor  
740 (Thermo Fisher, Cat. No. 10777019). Following 10 minutes incubation on ice and  
741 centrifugation at 21,000 x g for 1 minute, the supernatant, which contains the cytosolic fraction,  
742 was aspirated, and kept on ice. The nuclear fraction was washed with TD/0.5% NP-40/RVC

743 twice. Then, we used Trizol and a mixture of phenol-chloroform-isoamyl alcohol to isolate the  
744 RNA from both fractions. Isolated RNA was ethanol precipitated overnight in -80°C. cDNA was  
745 synthesized from 1.0 µg of total RNA, using oligo-dT priming and the QuantiTect Rev.  
746 Transcription Kit. Cytosolic and nuclear RNAs were measured by quantitative RT-PCR  
747 performed in triplicate, using the iTaq™ Universal SYBR® Green Super mix and a StepOne  
748 Plus qRT-PCR instrument. To validate the fractionation, we calculated the cytoplasmic/nuclear  
749 ratio of the *GAPDH* RNA. The exact values can be found in Supplementary Table 4. Data  
750 were normalized to 18S ribosomal RNA, which was used as an internal control. The primer  
751 sets used for all the all the quantitative RT-PCR assays are listed on the Supplementary Table  
752 2.

#### 754 **RT-PCR and qRT-PCR**

755 Total cell RNA was extracted using the PureLink RNA Kit (Invitrogen, Cat. No 12183018A).  
756 cDNA was synthesized from 1.0 µg of total RNA, using oligo-dT priming and the QuantiTect  
757 Rev. Transcription Kit (QIAGEN, Cat No. 205310). To monitor the RNA splicing of U2AF2,  
758 cDNA was used for RT-PCR. The abundance of RNA transcribed from a given gene, or from  
759 a given exon that may be alternatively spliced, was measured by quantitative RT-PCR. PCR  
760 reactions were performed in triplicate, using the iTaq™ Universal SYBR® Green Super mix  
761 (Biorad, Cat No. 1725121) and a StepOne Plus qRT-PCR instrument (Thermofisher), as  
762 described above. Data were normalized to hGAPDH or human 18S rRNA, which were used  
763 as internal controls. The primer sets used are listed in the Supplemental Table 2.

#### 764 **Immunoblotting**

765 Cells were lysed in RIPA lysis buffer {50 mM Tris (pH 7.5), 0.1% SDS, 150 mM NaCl, 5 mM  
766 EDTA, 0.5% Sodium deoxycholate, 1% NP-40 and fresh 1x Halt™ Protease and Phosphatase  
767 Inhibitor Cocktails (Thermofisher, Cat. No 78444)}. Lysates were sonicated twice for 30  
768 seconds and clarified by centrifugation at 18,000×g for 15 min at 4°C. The clarified lysates  
769 were electrophoresed (20µg protein per lane) in SDS-PAGE. Electrophoresed lysates were

770 transferred to polyvinylidene difluoride (PVDF) membranes (EMD Millipore Cat No.  
771 IPVH00010) in 25 mM Tris and 192 mM glycine. Following blocking with 5% nonfat dry milk in  
772 TBS and 0.1% Tween-20, the membranes were probed with antibodies (at the recommended  
773 dilution), followed by horseradish peroxidase-labeled secondary antibodies (1:2500), and they  
774 were developed with Pierce ECL Western Blotting Substrate (Thermo Scientific, cat. no  
775 32106). Antibodies we used for western blotting and chromatin immunocleavage (see below)  
776 are listed in Supplemental Table 1.

### 777 **RNA Immunoprecipitation**

778 Cell monolayers in 10cm plates were treated 1% formaldehyde (Sigma, Cat. No F8775) at  
779 37°C for 15 minutes, to cross-link RNA to associated proteins. The cross-linking reaction was  
780 stopped by treatment with 0.125M Glycine for 5 minutes at room temperature. Cells were then  
781 scraped in 1 ml of a buffer consisting of 1x Phosphate Buffered Saline (PBS) / Nuclear Isolation  
782 Buffer (1.28M sucrose, 40mM Tris-HCl, 20mM MgCl<sub>2</sub>, 4% Triton-X 100) / H<sub>2</sub>O (1:1:3 ratio).  
783 Following two additional washes, cell were lysed with RIP buffer {(150mM KCl, 25mM Tris-  
784 HCl, 5mM EDTA, 0.5mM DTT, 0.5% NP-40, supplemented with fresh 1x Halt™ Protease and  
785 Phosphatase Inhibitor Cocktails (ThermoFisher, Cat. No 78444) and RNaseOUT™  
786 Recombinant Ribonuclease Inhibitor (Thermo Fisher, Cat. No. 10777019) and the lysates  
787 were incubated on ice for 10 minutes. The lysates were clarified by centrifugation at 14,000  
788 rpm, for 30 minutes at 4°C. A fraction of each sample was then precleared by incubation with  
789 protein A and salmon sperm DNA-bound agarose beads (Cell Signaling, Cat. No 9863), for 1  
790 hour in 4°C. The precleared lysates were then incubated at 40°C overnight with the  
791 immunoprecipitating antibody (Supplementary Table S1) or with the IgG isotype control  
792 {Rabbit Isotype Control (ThermoFisher, Cat. No 10500C or Mouse Isotype Control  
793 (ThermoFisher, Cat. No 10400C) and for 4 additional hours with Pierce™ Protein A/G Magnetic  
794 Beads (ThermoFisher, Cat. No 88803). Beads were then washed four times with the RIP buffer  
795 and resuspended in 100uL RIP buffer. Next, the protein-RNA cross-linking was reversed by  
796 incubating the samples for 60 minutes at 70°C and following this, the RNA-protein complexes

797 were eluted by treatment with 0.1% SDS 100  $\mu$ L RIP buffer and treatment with proteinase K  
798 for 60 minutes at 55°C. The RNA was then extracted using a phenol-chloroform-isoamyl  
799 alcohol mixture and it was ethanol precipitated at -80°C overnight, in the presence of yeast  
800 tRNA (10mg/mL). The recovered RNA was reverse-transcribed with random hexamers and  
801 the abundance of cDNA corresponding to the RNA of specific target genes (IFNA1, IFNB, c-  
802 JUN and HSPB3) was measured by quantitative PCR using different sets of primers  
803 (Supplementary Table 2). PCR reactions in the RNA recovered from the immunoprecipitates  
804 and in 2% input RNA were carried out in triplicate, using the iTaq™ Universal SYBR® Green  
805 Super mix (Bio-Rad, Cat No. 1725121) and a StepOne Plus qRT-PCR instrument  
806 (Thermofisher). The data were analyzed the analysis file provided online by Sigma-Aldrich.  
807 ([https://www.sigmaaldrich.com/technical-documents/articles/biology/chip-qpcr-data-](https://www.sigmaaldrich.com/technical-documents/articles/biology/chip-qpcr-data-analysis.html)  
808 [analysis.html](https://www.sigmaaldrich.com/technical-documents/articles/biology/chip-qpcr-data-analysis.html)). SNRNP-70 binding in the human U1 snRNP gene, using the primers F: 5'-GGG  
809 AGA TAC CAT GAT CAC GAA GGT-3', R : 5'-CCA CAA ATT ATG CAG TCG AGT TTC CC-  
810 3', was used as the control for RNA IPs. The detailed protocol and buffer preparation can be  
811 found in the online protocols' depository (Laliotis et al., 2021<sup>51</sup>).

## 812 **Chromatin Immuno-Cleavage (ChIC)**

813 The binding of p-STAT1 on the ISREs in the promoters of the IFN-stimulated genes *IRF1*,  
814 *IRF9*, *STAT1* and *STAT2*, was addressed by chromatin Immuno-cleavage (Skene et al.,  
815 2018<sup>52</sup>, Laliotis et al., 2021<sup>3</sup>). 2.5x10<sup>5</sup> cells were washed several times with wash buffer (20mM  
816 HEPES (pH 7.5), 150mM NaCl, 0.5mM Spermidine) in the presence of fresh 1x Halt™  
817 Protease and Phosphatase Inhibitor Cocktails. Magnetic Biomag Plus Concanavalin A Beads  
818 (Bangs Laboratories, Cat. No. BP531) were activated with multiple washes using a binding  
819 buffer (20mM HEPES-KOH (pH 7.9), 10mM KCl, 1mM CaCl<sub>2</sub>, 1mM MnCl<sub>2</sub>). Prior to use, the  
820 immunoprecipitation antibodies (Supplementary Table 1) or the Rabbit Isotype Control  
821 (Thermofisher, Cat. No 10500C), were diluted in 1:50 dilution in 50  $\mu$ L antibody buffer (2mM  
822 EDTA (pH 8.0), 0.1% (wt/vol) digitonin diluted in wash buffer). Then, the activated beads were  
823 resuspended with the antibody buffer, containing the immunoprecipitated antibody, and mixed  
824 with the cell fraction. Following overnight incubation at 4°C, the immunoprecipitated were

825 subjected to multiple washes with the wash buffer. Similarly, to the primary  
826 immunoprecipitating antibody, the Guinea Pig anti-Rabbit IgG (Heavy & Light Chain)  
827 secondary antibody (Antibodies-Online, Cat. No. ABIN101961) was diluted in 1:50 dilution in  
828 50 $\mu$ L antibody buffer, was mixed with the immunoprecipitates and incubated for 4 hours at  
829 4°C. Subsequently, the immunoprecipitates were subjected to multiple washes with the wash  
830 buffer and mixed with the CUTANA™ pAG-MNase (EpiCypher, Cat No. SKU: 15-1116) at 700  
831 ng/mL. The targeted digestion was activated with 100mM CaCl<sub>2</sub> and occurred by incubation  
832 on ice for 30 minutes. The reaction was terminated with addition of 2x stop buffer (340mM  
833 NaCl, 20mM EDTA (pH 8.0), 4mM EGTA, 0.1% (wt/vol) digitonin, 0.2 mg RNAse A, 0.02 mg  
834 Glycogen) and the chromatin fragments were released by incubation at 37°C for 10 minutes.  
835 Subsequently, the chromatin fragments were extracted with DNA Purification Buffers and Spin  
836 Columns (Cell Signaling Technologies, Cat. No 14209). Real-time PCR using different sets of  
837 primers (Supplementary Table 2) to amplify the *ISRE* genomic loci of several ISGs was carried  
838 out in the immunoprecipitated DNA, as well as in the IgG-immunoprecipitated DNA, by using  
839 the iTaq™ Universal SYBR® Green Super mix (Bio-Rad, Cat No. 1725121) and a StepOne  
840 Plus qRT-PCR machine (Thermofisher). The data were analyzed using the analysis substrate  
841 file provided online by Sigma-Aldrich, calculating the fold enrichment.  
842 ([https://www.sigmaaldrich.com/technical-documents/articles/biology/chip-qpcr-data-](https://www.sigmaaldrich.com/technical-documents/articles/biology/chip-qpcr-data-analysis.html)  
843 [analysis.html](https://www.sigmaaldrich.com/technical-documents/articles/biology/chip-qpcr-data-analysis.html)). This is based on the previously published protocol of ChIC assays.

844

#### 845 **Virus-induced cell death.**

846 To quantitatively measure virus-induced cell death, NCI-H522 and NC-H1299 cells were  
847 plated in 24-well plates and they were infected with VSV-GFP, or Reovirus at increasing MOI.  
848 Sixteen hours later (VSV-GFP), or 48 hours later (Reovirus), infected cells, and control  
849 uninfected cells were treated with resazurin, which is reduced to resorufin in viable cells, in a  
850 reaction that can be easily monitored because resorufin is fluorescent ( $\lambda_{\text{abs}}/\lambda_{\text{em}} = 571/585$  nm).  
851 Control virus-infected and uninfected cells were treated with DMSO and their cell viability was  
852 measured with alamarBlue™ HS Cell Viability Reagent (Thermo Fisher Cat. No A50100). Cell



853 death measured, based on the fluorescence emitted following the reduction of resazurin, in  
854 virus-infected and uninfected cells was normalized, relative to the cell death detected in  
855 DMSO-treated control cells. The acquisition was performed at 570 nm using a SpectraMax  
856 iD5 v1.6 (Molecular Devices San Jose, CA). The percentage of surviving cells, following virus  
857 infection with different MOI was determined based on the comparison of the normalized values  
858 in virus infected and uninfected cells. The results were plotted using non-linear regression in  
859 GraphPad Prism 8.4

### 860 **Intronless genes and motif analysis**

861 The sequences of all human intronless genes were retrieved from Ensembl (Howe et al.,  
862 2021<sup>53</sup>) using biomaRt R (Durinck et al., 2009<sup>54</sup>). Precisely, by using biomaRt, we selected all  
863 human genes which had a single exon reported on Ensembl. Then, we annotated all these  
864 genes by using org.Hs.eg.db R package (Carlson et al., 2019<sup>55</sup>). All the non-annotated genes  
865 and low count genes in lung epithelial cells derived from ENCODE were filtered. Finally, we  
866 made a custom FASTA file containing the exon sequence of all annotated intron-less genes  
867 by using an ad hoc R script. For the motif analysis, the FASTA file was analyzed with the FIMO  
868 algorithm of the MEME suite (<https://meme-suite.org/meme/tools/fimo>) (Grant et al., 2011<sup>26</sup>)  
869 for the identification of CAR-E, using the known motif : [B][CA][AT]GH[AT][CG][CG][AT][CG],  
870 following standard parameters. The results of the motif analysis are available as  
871 Supplementary Data 1.

### 872 **Image acquisition and figure preparation**

873 Western blot images were acquired, using the Li-Cor Fc Odyssey Imaging System (LI-COR  
874 Biosciences, Lincoln, NE). Using a linear acquisition detection method, images were acquired  
875 in the 700 nm channel (protein ladder), in the 800 nm channel reduced background and  
876 increased sensitivity) and chemiluminescent channel (protein bands). For the DNA agarose  
877 gels, images were acquired using again the Li-Cor Fc Odyssey Imaging System and a linear  
878 image acquisition method in the 600 nm channel. All the images in this report were similarly

879 acquired to ensure that the analysis is unbiased. The images were exported in high-quality  
880 image files (600 dpi png files), which were imported in in Adobe Illustrator 2021 (Adobe, San  
881 Jose, CA) for the preparation of the figures.

## 882 **Human Tumor Samples.**

883 The 6 Lung Adenocarcinoma samples used in this report have been previously described in  
884 our earlier studies for the role of IWS1 in lung cancer (Sanidas et al., 2014<sup>1</sup>, Laliotis et al.,  
885 2021<sup>3</sup>). The tissues were obtained from the Tissue Bank of The Ohio State University, under  
886 the universal consenting and biobanking protocol, Total Cancer Care (TCC) and from the  
887 tissue bank of Tufts Medical Center, after written consent and review of the bioethics board  
888 committee. TCC is the single protocol used by the Oncology Research Information Exchange  
889 Network (ORIEN), which was formed through a partnership between the OSUCCC – James  
890 and Moffitt Cancer Center in Tampa, FL. For more information, please advise the Biospecimen  
891 Core Services facility of The Ohio State university Comprehensive Cancer Center  
892 ([https://cancer.osu.edu/for-cancer-researchers/resources-for-cancer-researchers/shared-](https://cancer.osu.edu/for-cancer-researchers/resources-for-cancer-researchers/shared-resources/biospecimen-services)  
893 [resources/biospecimen-services](https://cancer.osu.edu/for-cancer-researchers/resources-for-cancer-researchers/shared-resources/biospecimen-services)) and ORIEN project ([https://cancer.osu.edu/for-cancer-](https://cancer.osu.edu/for-cancer-researchers/resources-for-cancer-researchers/orien)  
894 [researchers/resources-for-cancer-researchers/orien](https://cancer.osu.edu/for-cancer-researchers/resources-for-cancer-researchers/orien)). The tumor samples in this study were  
895 provided as unidentified samples.

896

## 897 **TCGA/RPPA analysis**

898 TCGA data were downloaded from <https://portal.gdc.cancer.gov/>. Overall 658 TCGA-LUAD  
899 patients (all stages) were available. In addition to the RNASeq data, 516 of the 658 patients  
900 also had RPPA data on p-c-JUN S73 and IWS1. Heatmaps showing the distribution of the  
901 relative abundance of *IWS1*, *IFNA1*, *IFNB1*, *JUN* and *HSPB3* and correlation co-efficiency  
902 graphs were generated using the visualization tools of the Xena browser (<http://xena.ucsc.edu>  
903 ) and GraphPad Prism 8.4.

904

## 905 **Statistical analyses**

906 All the statistical analysis were performed, using GraphPad Prism. Details on the statistical  
907 tests used, can be found in the corresponding figure legend. All the statistical analyses reports  
908 can be found in the Mendeley dataset where the source data of this report were deposited.  
909 (Laliotis et al., 2021<sup>56</sup>, doi: 10.17632/853gfbbx7m.3)

## 910 **Code availability**

911 All the code used for the analysis in this report is derived from previously published reports. It  
912 is also explained and cited in the appropriate methods section.

## 914 **Data availability**

915 All the raw data underlying figures 1-8 (uncropped gel images, chart and bar data, qPCR, Flow  
916 Cytometry and plate reader data), derived from this report have been deposited in a publicly  
917 available Mendeley dataset (Laliotis et al., 2021<sup>56</sup>, doi: 10.17632/853gfbbx7m.3). Specific *P*  
918 values are also included in this dataset. The list of human intronless transcripts, along with the  
919 results of the FIMO motif analysis for the position of CAR-E in each gene, are provided as  
920 Supplementary Data 1. The FASTA file of all the selected human intronless genes for the motif  
921 analysis are provided in the Mendeley dataset (Laliotis et al., 2021<sup>56</sup>, doi:  
922 10.17632/853gfbbx7m.3). The latest version of Ensembl database can be downloaded  
923 through the Ensembl project (<http://useast.ensembl.org/info/data/ftp/index.html>) or github  
924 (<https://github.com/Ensembl/ensembl-hive>). All the uncropped WB and PCR gels are provided  
925 as Supplementary Data 3. All the chart and bar data are provided as Supplementary Data 4.

926

## 927 **Third Party Images**

928 The schematic for  $\beta$ -globin CAR-E reporter (Figure 5), the cartoon outlining the experiment of  
929 ISG induction by infection of NCI-H522 cells with VSV-GFP and the effect of the treatment of  
930 naïve NCI-H522 cells with culture supernatants of the VSV-GFP-infected NCI-H522 cells (Fig.

931 6b), as well as the cartoon summarizing the data in this report (Fig. 8), were created with Bio  
932 Render.com (<https://biorender.com>). Georgios I. Laliotis created the images. Philip N. Tsiichlis  
933 and Georgios I. Laliotis edited them in their final version. The authors used a paid student plan  
934 promo (legacy) with the Agreement Numbers OO22MW9YPA, UR22MWA47E, SC22PV8Z05  
935 for Figure 5, 6 and 8, respectively, for granted publication access.

936

### 937 **Statistics and reproducibility**

938 The experiments in Fig. 1a-d, 2a-f, 3a-b, 4a-b, 6a-d, Supplementary Figure 5a-c, 7a-b,  
939 Supplementary Figure 7a-c, were performed at least in 3 independent biological experiments.  
940 The data in figure 4b (patients' data) were performed once, using 3 patients/group. The human  
941  $\beta$ -globin CAR-E reporter transient transfection in Figure 5 and Supplementary Figure 4 and  
942 the Poly (I:C) and IFN $\beta$ 1 stimulation in Figure 1d and Supplementary Figure 5, respectively,  
943 were performed twice. All the attempts at replications were successful. All the statistical  
944 analysis was performed in GraphPad Prism, as described in the corresponding section. All the  
945 statistical analysis reports can be found in the Mendeley dataset (Laliotis et al., 2021<sup>56</sup>, doi:  
946 10.17632/853gfbbx7m.3).

947

### 948 **Acknowledgments**

949

950 The authors wish to thank all the members of the Tsiichlis Lab for helpful discussions. We also  
951 thank Dr Samir Achaya for reviewing the manuscript before the submission. This work was  
952 supported by the NIH grant R01 CA186729 to P.N.T., the NIH grant R01 CA198117 to P.N.T  
953 and V.C, by start-up funds from the OSUCCC to P.N.T, from the National Center for Advancing  
954 Translational Sciences grant KL2TR002734 to L.S. G.I.L was supported by the Pelotonia Post-  
955 Doctoral fellowship from OSUCCC.

956

### 957 **Author Contributions**

958

959 **G.I.L.** Conceptualization, overall experimental design. Performed experiments, analyzed the  
960 data, prepared figures and wrote the manuscript. **A.D.K.** Designed and performed all the  
961 infections with viral strains, optimized, performed and analyzed the flow cytometry  
962 experiments and edited the manuscript **E.C.** Designed and performed with G.I.L the time point  
963 interval experiment for p-STAT1 activation and Caspase-mediated death in Figure 6 and  
964 Figure 7, edited the manuscript **A.O.** Assisted to the time point interval experiment for  
965 Caspase-mediated death and edited the manuscript **A.K.K** Performed the cloning of the type  
966 I IFN vectors for RNA Pol II and III promoter expression, performed RT-PCR experiments  
967 **A.L.F.** Bioinformatics analyses of TCGA data and intronless genes mining, edited the  
968 manuscript. **V.A.** Assisted to the time point interval experiment for p-STAT1 activation and  
969 edited the manuscript **J.D.B** Advised on the design of experiments and edited the manuscript  
970 **C.T.** Advised on the design of experiments and edited the manuscript. **L.S.** Advised on the  
971 design of experiments and edited the manuscript **V.C.** Contributed to overall experimental  
972 design, edited the manuscript. **J.S.Y** Designed the viral infection experiments and contributed  
973 to overall experimental design, edited the manuscript **P.N.T.** Conceptualization, overall  
974 experimental design, project supervision, manuscript writing and editing.

## 975 **Competing Interests**

976 The authors declare no competing interests.

## 977 **Corresponding authors**

978 Correspondence to : Philip N. Tsiichlis and Georgios I. Laliotis

## 979 **References**

980

- 981 1. Sanidas, I., Polytarchou, C., Hatziapostolou, M., Ezell, S.A., Kottakis, F., Hu, L., Guo,  
982 A., Xie, J., Comb, M.J., Iliopoulos, D. and Tsiichlis, P.N., 2014. Phosphoproteomics

- 983 screen reveals akt isoform-specific signals linking RNA processing to lung cancer.  
984 *Molecular cell*, 53(4), pp.577-590.
- 985 2. Zhou, Z., Qiu, J., Liu, W., Zhou, Y., Plocinik, R.M., Li, H., Hu, Q., Ghosh, G., Adams,  
986 J.A., Rosenfeld, M.G. and Fu, X.D., 2012. The Akt-SRPK-SR axis constitutes a major  
987 pathway in transducing EGF signaling to regulate alternative splicing in the  
988 nucleus. *Molecular cell*, 47(3), pp.422-433.
- 989 3. Laliotis, G.I., Chavdoula, E., Paraskevopoulou, M.D. et al. AKT3-mediated IWS1  
990 phosphorylation promotes the proliferation of EGFR-mutant lung adenocarcinomas  
991 through cell cycle-regulated *U2AF2* RNA splicing. *Nat Commun* 12, 4624 (2021).  
992 <https://doi.org/10.1038/s41467-021-24795-1>
- 993 4. Lei, H., Zhai, B., Yin, S., Gygi, S. and Reed, R., 2013. Evidence that a consensus  
994 element found in naturally intronless mRNAs promotes mRNA export. *Nucleic acids*  
995 *research*, 41(4), pp.2517-2525.
- 996 5. de Padilla, C.M.L. and Niewold, T.B., 2016. The type I interferons: Basic concepts and  
997 clinical relevance in immune-mediated inflammatory diseases. *Gene*, 576(1), pp.14-  
998 21.
- 999 6. Frisch, S.M. and MacFawn, I.P., 2020. Type I interferons and related pathways in cell  
1000 senescence. *Aging Cell*, p.e13234.
- 1001 7. Schreiber, G., 2017. The molecular basis for differential type I interferon  
1002 signaling. *Journal of Biological Chemistry*, 292(18), pp.7285-7294.
- 1003 8. Acosta, P.L., Byrne, A.B., Hijano, D.R. and Talarico, L.B., 2020. Human Type I  
1004 Interferon Antiviral Effects in Respiratory and Re Emerging Viral Infections. *Journal of*  
1005 *Immunology Research*, 2020.
- 1006 9. Amarante-Mendes, G.P., Adjemian, S., Branco, L.M., Zanetti, L.C., Weinlich, R. and  
1007 Bortoluci, K.R., 2018. Pattern recognition receptors and the host cell death molecular  
1008 machinery. *Frontiers in immunology*, 9, p.2379.
- 1009 10. Ablasser, A. and Hur, S., 2019. Regulation of cGAS-and RLR-mediated immunity to  
1010 nucleic acids. *Nature Immunology*, pp.1-13.

- 1011 11. Aleynick, M., Svensson-Arvelund, J., Flowers, C.R., Marabelle, A. and Brody, J.D.,  
1012 2019. Pathogen molecular pattern receptor agonists: treating cancer by mimicking  
1013 infection. *Clinical Cancer Research*, 25(21), pp.6283-6294.
- 1014 12. Lu, R., Au, W.C., Yeow, W.S., Hageman, N. and Pitha, P.M., 2000. Regulation of the  
1015 Promoter Activity of Interferon Regulatory Factor-7 Gene ACTIVATION BY  
1016 INTERFERON AND SILENCING BY HYPERMETHYLATION. *Journal of Biological*  
1017 *Chemistry*, 275(41), pp.31805-31812.
- 1018 13. Conzelmann, K.K., 2005. Transcriptional activation of alpha/beta interferon genes:  
1019 interference by nonsegmented negative-strand RNA viruses. *Journal of*  
1020 *virology*, 79(9), pp.5241-5248.
- 1021 14. Lazear, H.M., Lancaster, A., Wilkins, C., Suthar, M.S., Huang, A., Vick, S.C., Clepper, L.,  
1022 Thackray, L., Brassil, M.M., Virgin, H.W. and Nikolich-Zugich, J., 2013. IRF-3, IRF-5, and IRF-  
1023 7 coordinately regulate the type I IFN response in myeloid dendritic cells downstream of MAVS  
1024 signaling. *PLoS Pathog*, 9(1), p.e1003118.
- 1025 15. Park, A.K., Fong, Y., Kim, S.I., Yang, J., Murad, J.P., Lu, J., Jeang, B., Chang, W.C.,  
1026 Chen, N.G., Thomas, S.H. and Forman, S.J., 2020. Effective combination  
1027 immunotherapy using oncolytic viruses to deliver CAR targets to solid tumors. *Science*  
1028 *Translational Medicine*, 12(559).
- 1029 16. Rehman, H., Silk, A.W., Kane, M.P. and Kaufman, H.L., 2016. Into the clinic:  
1030 Talimogene laherparepvec (T-VEC), a first-in-class intratumoral oncolytic viral therapy.  
1031 *Journal for immunotherapy of cancer*, 4(1), pp.1-8.
- 1032 17. Martinez-Quintanilla, J., Seah, I., Chua, M. and Shah, K., 2019. Oncolytic viruses:  
1033 overcoming translational challenges. *The Journal of Clinical Investigation*, 129(4),  
1034 pp.1407-1418.
- 1035 18. Kroczyńska, B., Mehrotra, S., Arslan, A.D., Kaur, S. and Plataniás, L.C., 2014.  
1036 Regulation of interferon-dependent mRNA translation of target genes. *Journal of*  
1037 *Interferon & Cytokine Research*, 34(4), pp.289-296.

- 1038 19. Gantner, B.N., Jin, H., Qian, F., Hay, N., He, B. and Richard, D.Y., 2012. The Akt1  
1039 isoform is required for optimal IFN- $\beta$  transcription through direct phosphorylation of  $\beta$ -  
1040 catenin. *The Journal of Immunology*, 189(6), pp.3104-3111.
- 1041 20. Ezell, S.A., Polytarchou, C., Hatzia Apostolou, M., Guo, A., Sanidas, I., Bihani, T., Comb,  
1042 M.J., Sourvinos, G. and Tsi chlis, P.N., 2012. The protein kinase Akt1 regulates the  
1043 interferon response through phosphorylation of the transcriptional repressor EMSY.  
1044 *Proceedings of the National Academy of Sciences*, 109(10), pp.E613-E621.
- 1045 21. Hogg, R., McGrail, J.C. and O'Keefe, R.T., 2010. The function of the NineTeen  
1046 Complex (NTC) in regulating spliceosome conformations and fidelity during pre-mRNA  
1047 splicing.
- 1048 22. Chanarat, S. and Str  ber, K., 2013. Splicing and beyond: the many faces of the Prp19  
1049 complex. *Biochimica et Biophysica Acta (BBA)-Molecular Cell Research*, 1833(10),  
1050 pp.2126-2134.
- 1051 23. Yount, J.S., Kraus, T.A., Horvath, C.M., Moran, T.M. and L  pez, C.B., 2006. A novel  
1052 role for viral-defective interfering particles in enhancing dendritic cell maturation. *The*  
1053 *Journal of Immunology*, 177(7), pp.4503-4513.
- 1054 24. Bedsaul, J.R., Zaritsky, L.A. and Zoon, K.C., 2016. Type I interferon-mediated  
1055 induction of antiviral genes and proteins fails to protect cells from the cytopathic effects  
1056 of Sendai virus infection. *Journal of Interferon & Cytokine Research*, 36(11), pp.652-  
1057 665.
- 1058 25. Yoh S.M., Cho H., Pickle L., Evans R.M., Jones K.A. The Spt6 SH2 domain binds  
1059 Ser2-P RNAPII to direct Iws1-dependent mRNA splicing and export. *Genes &*  
1060 *Dev.* 2007;21:160–174.
- 1061 26. Grant, C.E., Bailey, T.L. and Noble, W.S., 2011. FIMO: scanning for occurrences of a  
1062 given motif. *Bioinformatics*, 27(7), pp.1017-1018.
- 1063 27. David, C.J., Boyne, A.R., Millhouse, S.R. and Manley, J.L., 2011. The RNA polymerase  
1064 II C-terminal domain promotes splicing activation through recruitment of a U2AF65–  
1065 Prp19 complex. *Genes & development*, 25(9), pp.972-983.



- 1066 28. Schramm, L. and Hernandez, N., 2002. Recruitment of RNA polymerase III to its target  
1067 promoters. *Genes & development*, 16(20), pp.2593-2620.
- 1068 29. Dias, A.P., Dufu, K., Lei, H. and Reed, R., 2010. A role for TREX components in the  
1069 release of spliced mRNA from nuclear speckle domains. *Nature communications*, 1(1),  
1070 pp.1-10.
- 1071 30. Lei, H., Dias, A.P. and Reed, R., 2011. Export and stability of naturally intronless  
1072 mRNAs require specific coding region sequences and the TREX mRNA export  
1073 complex. *Proceedings of the National Academy of Sciences*, 108(44), pp.17985-  
1074 17990.
- 1075 31. Valencia, P., Dias, A.P. and Reed, R., 2008. Splicing promotes rapid and efficient  
1076 mRNA export in mammalian cells. *Proceedings of the National Academy of Sciences*,  
1077 105(9), pp.3386-3391.
- 1078 32. Lazear, H.M., Schoggins, J.W. and Diamond, M.S., 2019. Shared and distinct functions  
1079 of type I and type III interferons. *Immunity*, 50(4), pp.907-923.
- 1080 33. Chesarino, N.M., McMichael, T.M. and Yount, J.S., 2015. E3 ubiquitin ligase NEDD4  
1081 promotes influenza virus infection by decreasing levels of the antiviral protein IFITM3.  
1082 *PLoS Pathog*, 11(8), p.e1005095.
- 1083 34. Kenney, A.D., McMichael, T.M., Imas, A., Chesarino, N.M., Zhang, L., Dorn, L.E., Wu,  
1084 Q., Alfaour, O., Amari, F., Chen, M. and Zani, A., 2019. IFITM3 protects the heart  
1085 during influenza virus infection. *Proceedings of the National Academy of Sciences*,  
1086 116(37), pp.18607-18612.
- 1087 35. Sermersheim, M., Kenney, A.D., Lin, P.H., McMichael, T.M., Cai, C., Gumpfer, K.,  
1088 Adesanya, T.A., Li, H., Zhou, X., Park, K.H. and Yount, J.S., 2020. MG53 suppresses  
1089 interferon- $\beta$  and inflammation via regulation of ryanodine receptor-mediated  
1090 intracellular calcium signaling. *Nature communications*, 11(1), pp.1-12.
- 1091 36. Altman, J.B., Taft, J., Wedeking, T., Gruber, C.N., Holtmannspötter, M., Piehler, J. and  
1092 Bogunovic, D., 2020. Type I IFN is siloed in endosomes. *Proceedings of the National  
1093 Academy of Sciences*, 117(30), pp.17510-17512.

- 1094 37. Wang, W., Xu, L., Su, J., Peppelenbosch, M.P. and Pan, Q., 2017. Transcriptional  
1095 regulation of antiviral interferon-stimulated genes. *Trends in microbiology*, 25(7),  
1096 pp.573-584.
- 1097 38. Schreiber, L.M., Urbiola, C., Das, K., Spiesschaert, B., Kimpel, J., Heinemann, F.,  
1098 Stierstorfer, B., Müller, P., Petersson, M., Erlmann, P. and von Laer, D., 2019. The lytic  
1099 activity of VSV-GP treatment dominates the therapeutic effects in a syngeneic model  
1100 of lung cancer. *British journal of cancer*, 121(8), pp.647-658.
- 1101 39. Villalona-Calero, M.A., Lam, E., Otterson, G.A., Zhao, W., Timmons, M.,  
1102 Subramaniam, D., Hade, E.M., Gill, G.M., Coffey, M., Selvaggi, G. and Bertino, E.,  
1103 2016. Oncolytic reovirus in combination with chemotherapy in metastatic or recurrent  
1104 non-small cell lung cancer patients with K RAS-activated tumors. *Cancer*, 122(6),  
1105 pp.875-883.
- 1106 40. Chaitanya, G.V., Alexander, J.S. and Babu, P.P., 2010. PARP-1 cleavage fragments:  
1107 signatures of cell-death proteases in neurodegeneration. *Cell Communication and*  
1108 *Signaling*, 8(1), p.31.
- 1109 41. Sträßer, K., Masuda, S., Mason, P., Pfannstiel, J., Oppizzi, M., Rodriguez-Navarro, S.,  
1110 Rondón, A.G., Aguilera, A., Struhl, K., Reed, R. and Hurt, E., 2002. TREX is a  
1111 conserved complex coupling transcription with messenger RNA export. *Nature*,  
1112 417(6886), pp.304-308.
- 1113 42. Seo, G.J., Yang, A., Tan, B., Kim, S., Liang, Q., Choi, Y., Yuan, W., Feng, P., Park,  
1114 H.S. and Jung, J.U., 2015. Akt kinase-mediated checkpoint of cGAS DNA sensing  
1115 pathway. *Cell reports*, 13(2), pp.440-449.
- 1116 43. Tian, J., Zhang, X., Wu, H., Liu, C., Li, Z., Hu, X., Su, S., Wang, L.F. and Qu, L., 2015.  
1117 Blocking the PI3K/AKT pathway enhances mammalian reovirus replication by  
1118 repressing IFN-stimulated genes. *Frontiers in microbiology*, 6, p.886.
- 1119 44. Xia, T., Konno, H., Ahn, J. and Barber, G.N., 2016. Deregulation of STING signaling in  
1120 colorectal carcinoma constrains DNA damage responses and correlates with  
1121 tumorigenesis. *Cell reports*, 14(2), pp.282-297.

- 1122 45. Bommareddy, P.K., Shettigar, M. and Kaufman, H.L., 2018. Integrating oncolytic  
1123 viruses in combination cancer immunotherapy. *Nature Reviews Immunology*, 18(8),  
1124 p.498.
- 1125 46. Rajani, K., Parrish, C., Kottke, T., Thompson, J., Zaidi, S., Ilett, L., Shim, K.G., Diaz,  
1126 R.M., Pandha, H., Harrington, K. and Coffey, M., 2016. Combination therapy with  
1127 reovirus and anti-PD-1 blockade controls tumor growth through innate and adaptive  
1128 immune responses. *Molecular Therapy*, 24(1), pp.166-174.
- 1129 47. Saha, D., Martuza, R.L. and Rabkin, S.D., 2017. Macrophage polarization contributes  
1130 to glioblastoma eradication by combination immunovirotherapy and immune  
1131 checkpoint blockade. *Cancer cell*, 32(2), pp.253-267.
- 1132 48. Bishnoi, S., Tiwari, R., Gupta, S., Byraredy, S.N. and Nayak, D., 2018. Oncotargeting  
1133 by vesicular stomatitis virus (VSV): advances in cancer therapy. *Viruses*, 10(2), p.90.
- 1134 49. Gong, K., Guo, G., Panchani, N., Bender, M.E., Gerber, D.E., Minna, J.D., Fattah, F.,  
1135 Gao, B., Peyton, M., Kernstine, K. and Mukherjee, B., 2020. EGFR inhibition triggers  
1136 an adaptive response by co-opting antiviral signaling pathways in lung cancer. *Nature*  
1137 *Cancer*, 1(4), pp.394-409.
- 1138 50. Obeng, E.A., Stewart, C. and Abdel-Wahab, O., 2019. Altered RNA Processing in  
1139 Cancer Pathogenesis and Therapy. *Cancer discovery*, 9(11), pp.1493-1510.
- 1140 51. Georgios I Laliotis, Philip N. Tsiichlis 2020. Effective identification of RNA-binding  
1141 proteins using RNA Immunoprecipitation. Protocols.io,  
1142 [dx.doi.org/10.17504/protocols.io.bjpbkmin](https://doi.org/10.17504/protocols.io.bjpbkmin)
- 1143 52. Skene, P.J. and Henikoff, S., 2017. An efficient targeted nuclease strategy for high-  
1144 resolution mapping of DNA binding sites. *Elife*, 6, p.e21856.
- 1145 53. Howe, K.L., Achuthan, P., Allen, J., Allen, J., Alvarez-Jarreta, J., Amode, M.R.,  
1146 Armean, I.M., Azov, A.G., Bennett, R., Bhai, J. and Billis, K., 2021. Ensembl  
1147 2021. *Nucleic acids research*, 49(D1), pp.D884-D891.

1148 54. Durinck, S., Spellman, P.T., Birney, E. and Huber, W., 2009. Mapping identifiers for  
1149 the integration of genomic datasets with the R/Bioconductor package biomaRt. *Nature*  
1150 *protocols*, 4(8), pp.1184-1191.

1151 55. Carlson, M., Falcon, S., Pages, H. and Li, N., 2019. org. Hs. eg. db: Genome wide  
1152 annotation for Human. *R package version*, 3(2).

1153 56. Laliotis, Georgios I.; Kenney, Adam; Chavdoula, Evangelia; La Ferlita, Alessandro;  
1154 Anastas, Vollter; Yount, Jacob; Tsihchis, Philip N. (2021), "IWS1 phosphorylation  
1155 controls nucleocytoplasmic export of type I IFNs and the sensitivity to oncolytic viruses,  
1156 through U2AF2 RNA splicing", Mendeley Data, V1, doi: 10.17632/853gfbbx7m.3

1157

## 1158 **Figure legends**

1159 **Figure 1. IWS1 phosphorylation regulates the nucleocytoplasmic transport of mRNAs**  
1160 **transcribed from a set of intronless genes, via a process depending on the alternative**  
1161 **RNA splicing of U2AF2.**

1162 a. Western blots of lysates of NCI-H522 and NCI-H1299 cells, transduced with the  
1163 indicated constructs and probed with anti-IWS1, anti-phosphor-IWS1, anti-U2AF65  
1164 and anti- $\beta$ -actin antibodies. RT-PCR of *U2AF2*, using oligonucleotide primers that map  
1165 in exons 1 and 3 (fifth row).

1166 b. *IWS1 phosphorylation regulates the nuclear export of intronless mRNAs.* Cells were  
1167 fractionated into cytoplasmic and nuclear fractions. The abundance of the RNAs of  
1168 *IFNA1, IFNB1, JUN, HSPB3 and GAPDH* in each fraction was determined using qRT-  
1169 PCR and it was normalized relative to the 18S rRNA. Type I IFNs were induced by  
1170 SeV-GFP infection (MOI 0.5) and cells were harvested at 24 hours from the start of the  
1171 exposure to the virus. Bars show the mean normalized Cytoplasmic/Nuclear RNA ratio  
1172  $\pm$ SD. To validate the fractionation, we measured the Cytoplasmic/Nuclear ratio of the  
1173 *GAPDH* RNA (see supplementary Table 4).

- 1174 c. Motif analysis of intronless genes identified sets of CAR-E-positive and CAR-E-  
1175 negative genes. Using q-RT-PCR, we measured the abundance of the RNAs of 25  
1176 CAR-E-positive and 24 CAR-E-negative genes in the cytoplasmic and nuclear RNA  
1177 fractions described in b. The heatmaps were generated from the z-score of  
1178 Cytosolic/Nuclear RNA ratios.
- 1179 d. Total RNA was harvested from the NCI-H522 and NCI-H1299 cells in a, and b. The  
1180 expression of the indicated mRNAs was measured by qRT-PCR, and was normalized  
1181 to 18S rRNA. Heatmaps were generated from the z-scores of the abundance of the  
1182 indicated RNAs. Type I IFNs were induced by infection with SeV-GFP.
- 1183 e. (Left panel) Western blots of lysates of the NCI-H522 and NCI-H1299 cells in a and b  
1184 were probed with the indicated antibodies. Type I IFNs were induced by infection with  
1185 SeV-GFP or by treatment with Poly (I:C) {5 $\mu$ g/mL for 6h (NCI-H522) or 12h (NCI-  
1186 H1299)}. (Right panel) Quantification of the relative abundance of the indicated  
1187 proteins in the experiment on the left. Bars show relative expression normalized to  
1188 loading control $\pm$ SD. All experiments in this figure were done in triplicate, on three  
1189 biological replicates. n.s : non-significant \* $p$ <0.05, \*\* $p$ <0.01, \*\*\* $p$ <0.001, \*\*\*\* $p$ <0.0001.  
1190 (one-side unpaired t-test).

1191 **Figure 2. The phosphorylation of IWS1 by AKT3 is required for the *U2AF2* RNA splicing-**  
1192 **dependent nuclear export of intronless gene mRNAs**

- 1193 a. *Inhibiting AKT interferes with the inclusion of exon 2 in mature U2AF2 mRNA*  
1194 *transcripts* NCI-H522 and NCI-H1299 cells were treated with MK2206 (5 $\mu$ M) or DMSO.  
1195 Lysates of these cells harvested 4h later, were probed with the indicated antibodies.  
1196 Total RNA isolated from the same cells was also analyzed by RT-PCR, using  
1197 oligonucleotide primers mapping in *U2AF2* exons 1 and 3.
- 1198 b. *The AKT kinase regulates the nucleocytoplasmic export of intronless mRNAs, through*  
1199 *IWS1 phosphorylation.* Cells in a were infected with SeV-GFP (MOI 0.25), to induce  
1200 type I IFN gene expression. Infected and uninfected cell lysates harvested 24h later,

1201 were fractionated into cytoplasmic and nuclear fractions, and mRNA levels of the  
1202 indicated genes in each fraction were measured, using qRT-PCR. RNA levels for each  
1203 transcript, were normalized to 18S rRNA. Bars show the mean normalized  
1204 Cytosolic/Nuclear RNA ratio $\pm$ SD.

1205 **c.** NCI-H522 and NCI-H1299 lysates of the cells in a, were probed with the indicated  
1206 antibodies. Type I IFNs were induced again by SeV-GFP infection, as in 2b.

1207 **d.** The NCI-H522 and NCI-H1299 cells were transduced with lentiviral shAKT3 or  
1208 shControl constructs. Lysates of these cells were probed with the indicated antibodies.  
1209 Total RNA was also analyzed by RT-PCR, using primers mapping in *U2AF2* exons 1  
1210 and 3.

1211 **e.** Cells in d were infected with SeV-GFP (MOI 0.5), to induce type I IFN expression.  
1212 Infected and uninfected cell lysates harvested 24h later, were fractionated into  
1213 cytoplasmic and nuclear fractions, and the abundance of the indicated mRNAs in each  
1214 fraction was determined, using qRT-PCR. RNA levels, were normalized to 18S rRNA.  
1215 Bars show the mean normalized Cytosolic/Nuclear RNA ratio  $\pm$ SD.

1216 **f.** NCI-H522 and NCI-H1299 lysates of cells in d, were probed with the indicated  
1217 antibodies. Type I IFNs were induced again by SeV-GFP infection. To validate the  
1218 cellular fractionation in the experiments in b and e we measured the  
1219 Cytosolic/Nuclear ratio of the *GAPDH* RNA, as in figure 1b (see supplementary  
1220 Table 4). Experiment in b and e were done on three biological replicates, in triplicate.  
1221 n.s: non-significant \* $p$ <0.05, \*\* $p$ <0.01, \*\*\* $p$ <0.001, \*\*\*\* $p$ <0.0001 (one-side unpaired t-  
1222 test).

1223 **Figure 3. IWS1 phosphorylation controls the recruitment of Prp19 to mRNA CAR-**  
1224 **Elements, by promoting the inclusion of exon 2 in the *U2AF2* mRNA, in both cultured**  
1225 **cells and primary human LUADs.**

1226 **a. and b.** *IWS1 phosphorylation controls the recruitment of Prp19 to CAR-Elements, by*  
1227 *regulating *U2AF2* alternative RNA splicing.* NCI-H522 and NCI-H1299 cells  
1228 transduced with the indicated constructs, were infected with SeV-GFP (MOI 0.5). 24h

1229 later, infected cells and parallel cultures of uninfected cells, were used for RIP assays  
1230 addressing the binding of U2AF65 (upper panels) and Prp19 (lower panels) to CAR-  
1231 Elements or to sequences without CAR-Elements in the indicated RNAs. The bars  
1232 show the mean fold enrichment in U2AF65 and Prp19 binding (anti-U2AF65 or anti-  
1233 Prp19-IP, vs IgG control-IP)±SD. Data were normalized relative to the input (2%). The  
1234 map location of the PCR primers used to amplify the binding regions is shown in  
1235 Supplementary Figure 2a.

1236 **c.** The *IWS1 phosphorylation-dependent nuclear export of the mRNAs of intronless*  
1237 *genes is active in human Lung Adenocarcinomas.* (Upper panel) Western blots of  
1238 lysates of 6 human LUAD samples (3 with high and 3 with low IWS1 expression),  
1239 randomly selected out of LUAD samples previously analyzed (Lalotitis et al., 2021<sup>3</sup>),  
1240 were probed with the indicated antibodies (top three rows). RT-PCR, using primers  
1241 mapping in *U2AF2* exons 1 and 3 (bottom row) (Lower Panel) LUAD tumor samples  
1242 were fractionated into cytoplasmic and nuclear fractions. mRNA levels of the indicated  
1243 genes were determined in each fraction, using qRT-PCR. Fractionation was validated  
1244 as in figures 1b/1c and 2b/2e (Supplementary Table 4). Bars show the mean  
1245 Cytoplasmic/Nuclear RNA ratio, normalized to the 18S ribosomal RNA ±SD.

1246 **d.** *IWS1 phosphorylation controls the recruitment of Prp19 to CAR-Elements in*  
1247 *the mRNAs of CAR-Element-positive intronless genes, in human Lung*  
1248 *Adenocarcinomas.* RIP assays in the high and low-IWS1 LUADs, shown in c. The bars  
1249 show the mean fold enrichment in U2AF65 (upper panel) and Prp19 (lower panel)  
1250 binding to the same CAR-Element-positive and CAR-Element-negative regions as in  
1251 a and b (anti-U2AF65 or anti-Prp19-IP, vs IgG control-IP)±SD. Data were normalized  
1252 relative to the input (2%). All experiment in this figure were done in triplicate, on three  
1253 biological replicates. n.s : non-significant \*p<0.05, \*\*p<0.01, \*\*\*p<0.001, \*\*\*\*p<0.0001.  
1254 (one-side unpaired t-test).

1255

1256 **Figure 4. Type I IFN mRNAs transcribed from an RNA Pol III promoter, fail to exit the**  
1257 **nucleus.**

- 1258 **a.** *Type I IFN mRNAs are transcribed equally well from an RNA Pol II and an RNA Pol III*  
1259 *promoter, but only the mRNAs transcribed from the RNA Pol II promoter are exported*  
1260 *efficiently to the cytoplasm. (Upper panel) Total RNA was harvested from shControl,*  
1261 *shIFNA1 (or shIFNB1), shIFNA1/pLx304-IFN $\alpha$ 1 (or shIFNB1/pLx304-IFN $\beta$ 1) and*  
1262 *shIFNA1/pLKO.1-IFN $\alpha$ 1 (or shIFNB1/pLKO.1-IFN $\beta$ 1) NCI-H522 and NCI-H1299 cells.*  
1263 *pLx304-IFNA1 and pLx304-IFNB1 drive IFN $\alpha$ 1 and IFN $\beta$ 1 expression respectively,*  
1264 *from the CMV (RNA Pol II) promoter, while pLKO.1-IFNA1 and pLKO.1-IFNB1 drive*  
1265 *IFN $\alpha$ 1 and IFN $\beta$ 1 expression respectively, from the U6 (RNA Pol III) promoter. The*  
1266 *maps of the pLX304 and pLKO.1 constructs are shown in supplementary figure 3. The*  
1267 *abundance of the mRNAs of IFNA1 and IFNB1, was determined by qRT-PCR and was*  
1268 *normalized to the abundance of 18S rRNA. Heatmaps were generated, based on the*  
1269 *z scores of the abundance of the mRNAs of IFNA1 and IFNB1. Type I IFNs were*  
1270 *induced by infection with SeV. (Lower panel) The cells in the upper panel were*  
1271 *fractionated into cytoplasmic and nuclear fractions and the abundance of IFNA1,*  
1272 *IFNB1 and GAPDH mRNAs in each fraction was determined with qRT-PCR Bars show*  
1273 *the mean Cytoplasmic/Nuclear ratio of the IFNA1 and IFNB1 mRNAs, normalized to*  
1274 *18S rRNA.  $\pm$ SD. All assays in were done on three biological replicates, in triplicate for*  
1275 *each replicate. \*\*\*p<0.001, \*\*\*\*p<0.0001. (one-side unpaired t-test). Cell fractionation*  
1276 *was validated as in figures 1b/1c, 2b/2e and 3c (Supplementary Table 4).*
- 1277 **b.** Western blots of lysates of the shControl, shIFNB1, shIFNB1/pLx304-IFNB1 and  
1278 shIFNB1/pLKO.1-IFNB1 NCI-H522 and NCI-H1299 cells in A, were probed with anti-  
1279 IFN $\beta$ 1 and anti- $\beta$ -actin (control) antibodies. Cells were harvested 24 hours after  
1280 infection with SeV-GFP (MOI=0.5).



1281 **Figure 5. The RNA nuclear export function of the Cytoplasmic Accumulation Region**  
1282 **Elements (CAR-Elements) is under the control of IWS1 phosphorylation and the**  
1283 **alternative RNA splicing of U2AF2.**

1284 a. *Schematic of the pCMV-HA- $\beta$ -globin cDNA construct.* The sequences of the CAR-E  
1285 and CAR-E<sub>mut</sub> are shown and the map position of their insertion is indicated with a solid  
1286 arrow (Lei et al., 2013<sup>4</sup>). The transcription initiation site, the translation initiation codon  
1287 (ATG), the HA epitope tag, the bovine growth hormone (BGH) polyA signal (pA) and  
1288 the sizes of the exons in base pairs are also shown. The schematic for  $\beta$ -globin CAR-  
1289 E reporter was created with Biorender.com under the third-party publication license  
1290 permission OO22MW9YPA.

1291 b. *IWS1 phosphorylation is required for CAR-E function.* shControl, shIWS1,  
1292 shIWS1/WT-R, shIWS1/MT-R, shIWS1/U2AF65 $\alpha$ -R and shIWS1/U2AF65 $\beta$ -R NCI-  
1293 H522 cells, were transfected transiently with pCMV-based constructs of HA- $\beta$ -globin  
1294 cDNA, HA- $\beta$ -globin Gene, HA- $\beta$ -globin cDNA-CAR-E and HA- $\beta$ -globin cDNA-CAR-  
1295 E<sub>mut</sub>. Transfected cells were harvested 48h later, and their lysates were probed with  
1296 the indicated antibodies.

1297 **Figure 6. The low expression of type I IFNs in shIWS1 and shIWS1/MT-R cells enhances**  
1298 **their sensitivity to viral infection.**

1299 a. *Loss of IWS1 expression and phosphorylation, enhance the sensitivity of cells to viral*  
1300 *infection.* shControl, shIWS1, shIWS1/WT-R and shIWS1/MT-R NCI-H522 cells were  
1301 infected with VSV-GFP, Influenza A-GFP (IAV-GFP) or Reovirus. In addition,  
1302 shControl and shIWS1 NCI-H522 cells were infected with SeV-GFP. All infections and  
1303 analyses were carried out as described in the methods. (Left panels) Flow-cytometric  
1304 analyses, representative of at three independent experiments. (Middle panels)  
1305 Quantification of the data from all three experiments. Bars show the percentage of  
1306 infected cells  $\pm$ SD. (Right panels) The expression of viral genes in cells infected with

1307 the same viruses was quantified by qRT-PCR, as described in the methods Bars show  
1308 the relative expression of viral genes  $\pm$ SD.

1309 **b.** *Design of the experiment in c and d.* The indicated cells were infected with VSV-GFP  
1310 (MOI=0.5). 16h later, total RNA was harvested and analyzed by qRT-PCR for the  
1311 expression of the mRNAs of 20 ISGs. In parallel, the supernatants of shControl and  
1312 shIWS1 cultures were harvested and used in a bioassay for the abundance of  
1313 biologically active IFN-type-I. Naïve NCI-H522 cells were treated with the supernatants  
1314 and examined for STAT1-phosphorylation and the binding of phosphor-STAT1 to the  
1315 ISREs of four ISGs. The schematic was created with Biorender.com under the third-  
1316 party publication license permission UR22MWA47E.

1317 **c.** Heatmaps showing the relative expression of 20 ISGs in the indicated cells, as  
1318 determined by qRT-PCR. ISG expression was normalized to 18S rRNA. Heatmaps  
1319 were based on z scores, derived from experiments on three biological replicates, done  
1320 in triplicate.

1321 **d.** (Upper panel). Naïve NCI-H522 cells were treated with culture supernatants as  
1322 described in 6b. Cell lysates were harvested at the indicated time-points and probed  
1323 with the indicated antibodies. (Lower panel) The cells in the upper panel were  
1324 harvested at 30' from the start of the exposure to the supernatants, and the lysates,  
1325 were used to carry out ChIC assays for p-STAT1 binding. The bars show the mean  
1326 fold enrichment in p-STAT1 binding to the ISREs of four ISGs $\pm$ SD, (anti-p-STAT1 IP  
1327 vs IgG-IP). All assays were done on three biological replicates. \*p<0.05, \*\*p<0.01,  
1328 \*\*\*p<0.001, \*\*\*\*p<0.0001. (one-side unpaired t-test).

1329

1330 **Figure 7. Inhibition of the AKT/p-IWS1 axis sensitizes lung adenocarcinoma cells to**  
1331 **virus-induced apoptotic cell death.**

1332 **a.** *The knockdown of IWS1 and its rescue with the phosphorylation site IWS1 mutant*  
1333 *sensitizes lung adenocarcinoma cell lines to virus-induced cell death.* ShControl,  
1334 shIWS1, shIWS1/WT-R and shIWS1/MT-R NCI-H522 cells were infected with VSV-

1335 GFP or Reovirus at the indicated MOIs. The percentage of surviving cells was  
1336 measured 16 hours later (for VSV-GFP) and 48 hours later (for Reovirus), using the  
1337 resazurin reduction protocol described in the methods section under “virus-induced  
1338 cell death”. The cell survival curves show the mean percent survival values at each  
1339 MOI $\pm$ SD (n=3) and they are representative of two independent experiments.

1340 **b.** *The inhibition of AKT, which is required for the phosphorylation of IWS1, sensitizes*  
1341 *lung adenocarcinoma cells to virus-induced cell death.* Parental NCI-H522 cells were  
1342 treated with DMSO or with the AKT inhibitor MK2206 (5 $\mu$ M) and they were infected  
1343 with VSV-GFP or Reovirus at the indicated MOIs. Infected and uninfected cells were  
1344 harvested 16 hours later (VSV-GFP), or 48 hours later (Reovirus) and their survival  
1345 was measured as in a. The cell survival curves show the mean percent survival values  
1346 at each MOI  $\pm$ SD (n=3) and they are representative of two independent experiments.

1347 **c.** *The knockdown of IWS1 accelerates the caspase-dependent cleavage of PARP1 in*  
1348 *virus-infected lung adenocarcinoma cell lines.* ShControl and shIWS1-transduced NCI-  
1349 H522 cells were infected VSV-GFP (MOI 1) and they were harvested at the indicated  
1350 time points. Western blots of the harvested cell lysates were probed with antibodies to  
1351 IWS1, cleaved PARP, or  $\alpha$ -tubulin.

1352

1353 **Figure 8. The AKT3/IWS1/U2AF2 axis promotes the nuclear export of the mRNAs of**  
1354 **CAR-Element-containing intronless genes and inhibits infection of cancer cell lines by**  
1355 **cytolytic viruses.**

1356 The phosphorylation of IWS1 at S720/T721 by AKT controls the epigenetic regulation  
1357 of the alternative RNA splicing of *U2AF2*, promoting the inclusion of exon 2 in the  
1358 mature *U2AF2* mRNA. The RS domain-containing *U2AF65 $\alpha$*  encoded by the exon 2-  
1359 containing *U2AF2* mRNA, is loaded to CAR-Elements in the mRNA of type I IFNs, and  
1360 other CAR-Element-positive intronless genes via RNA Pol II, and recruits Prp19. The  
1361 *U2AF65/Prp19* complex assembled on the CAR-Elements is required for the nuclear  
1362 export of these mRNAs. Overall, IWS1 expression and phosphorylation by AKT,

1363 enhances the abundance of the proteins encoded by CAR-Element-positive intronless  
1364 genes, including type I IFN genes and increases the resistance of the cells to infection  
1365 by cytolytic viruses. The schematic was created with Biorender.com under the third-  
1366 party publication license permission SC22PV8Z05.

WITHDRAWN  
see manuscript DOI for details

**Figure 1**

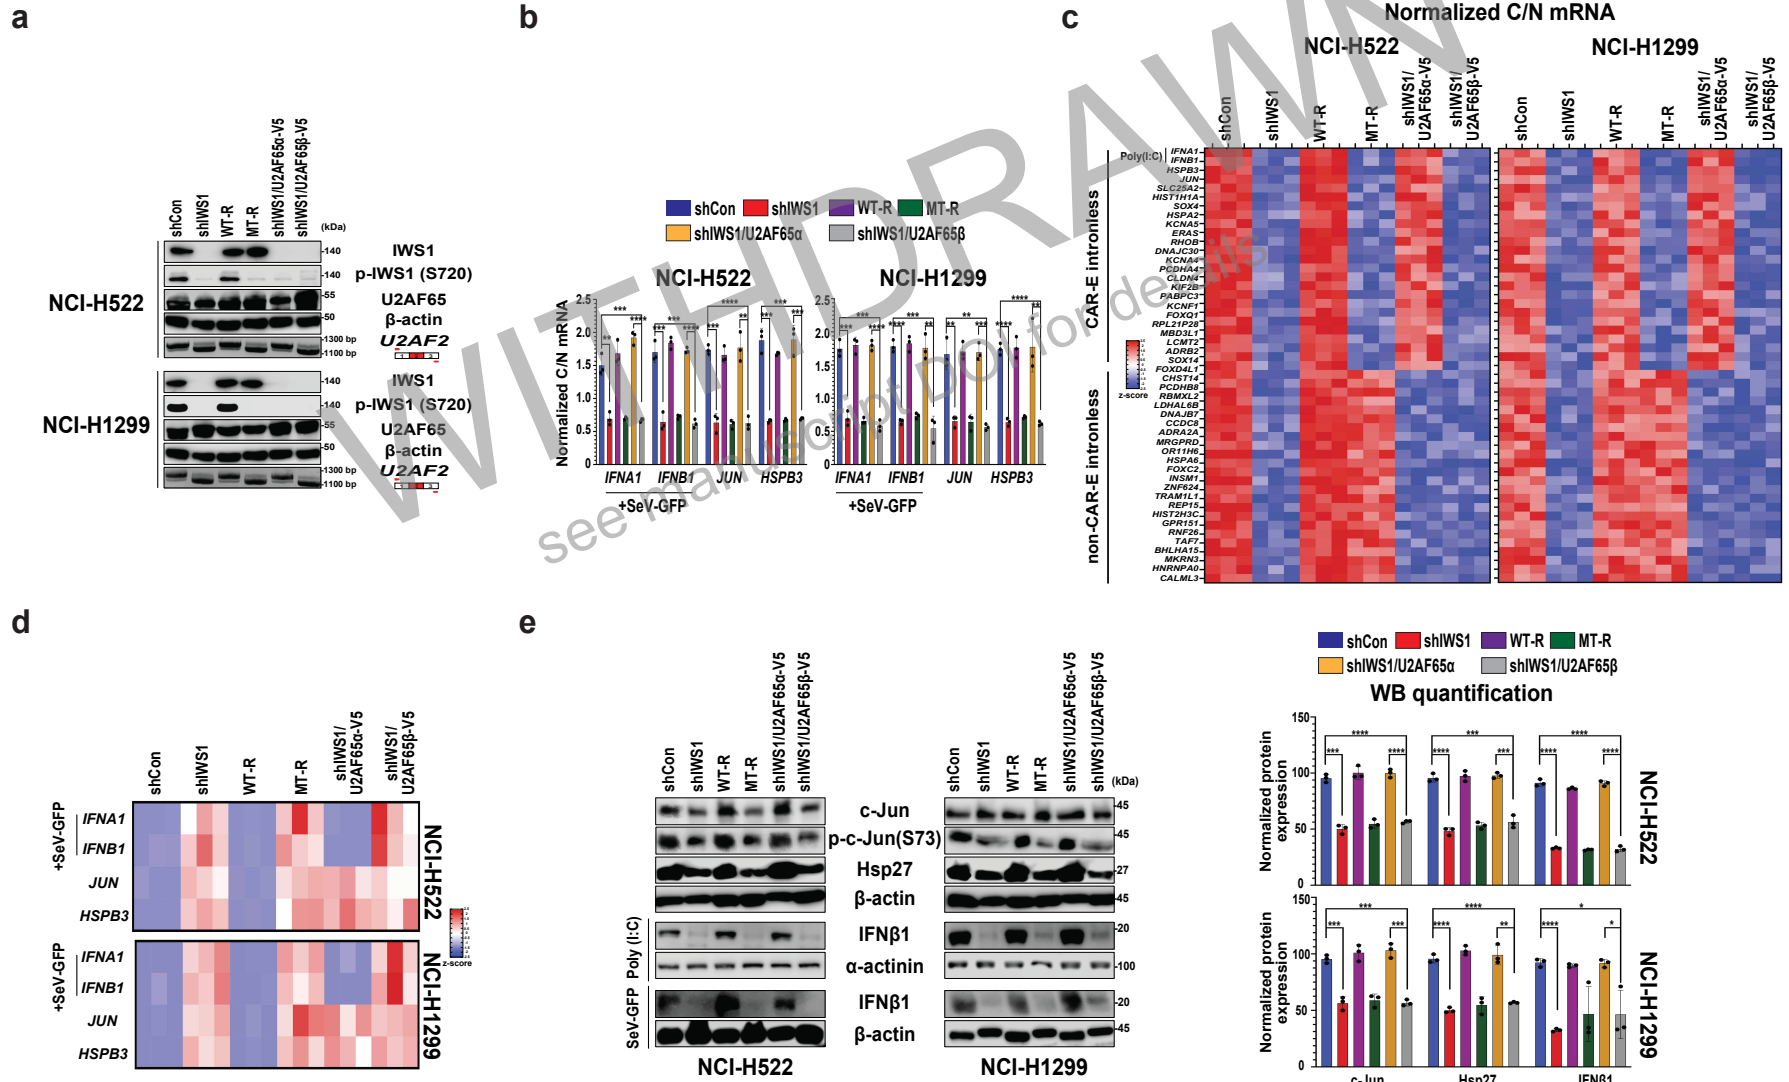

**Figure 2**

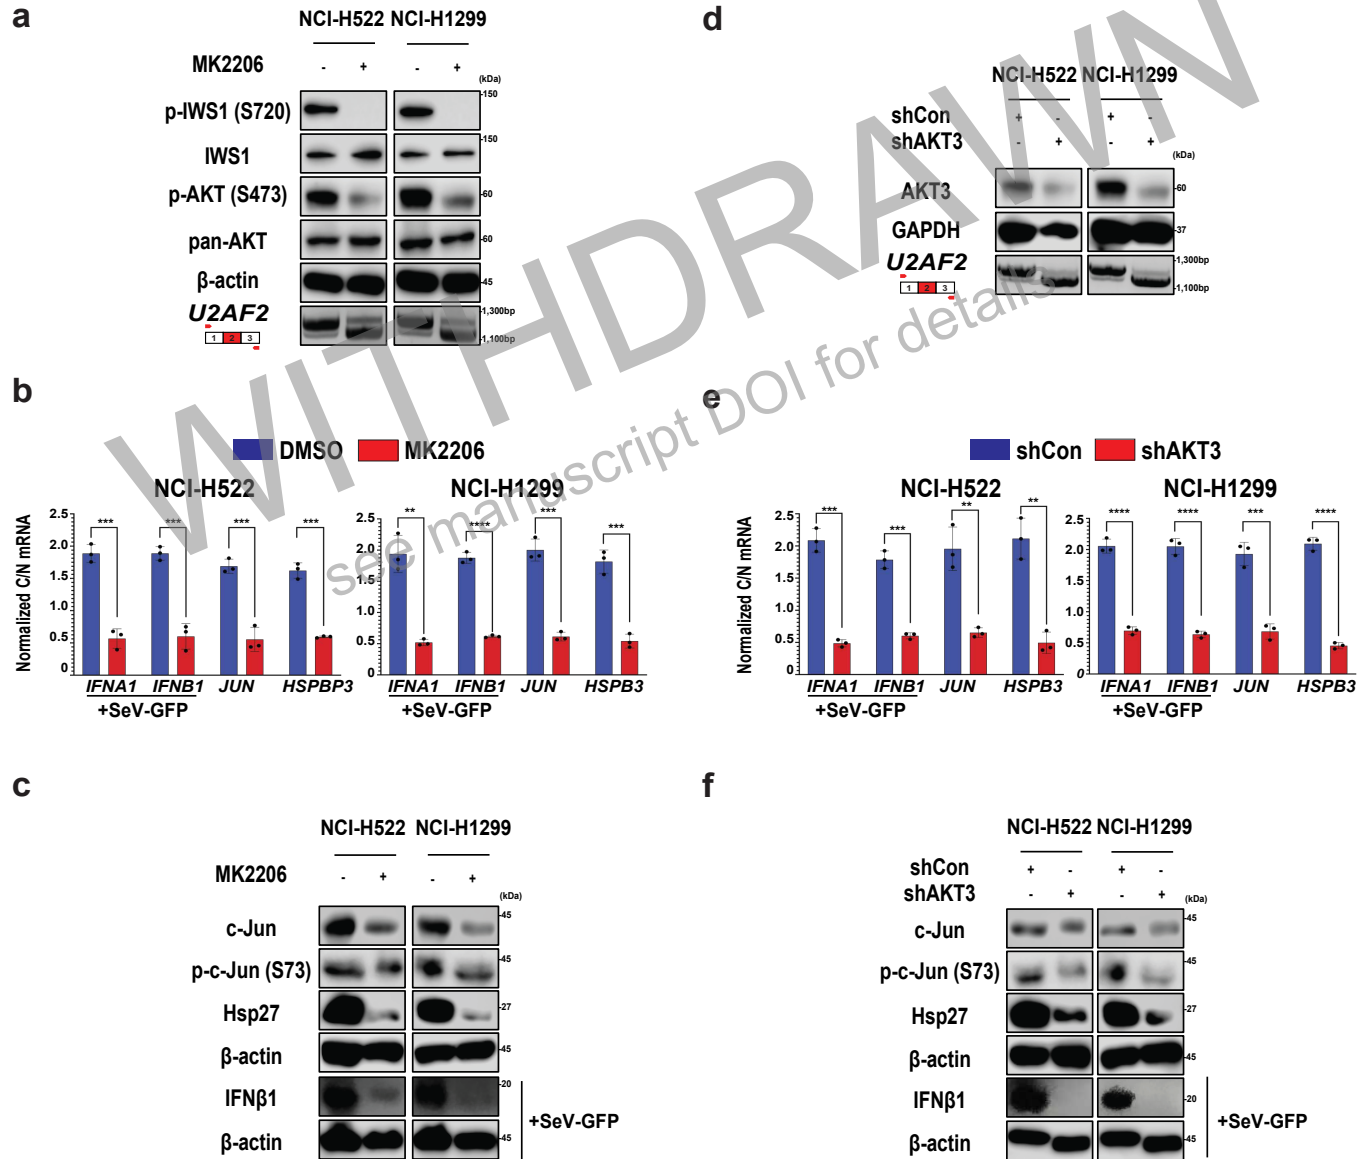

**Figure 3**

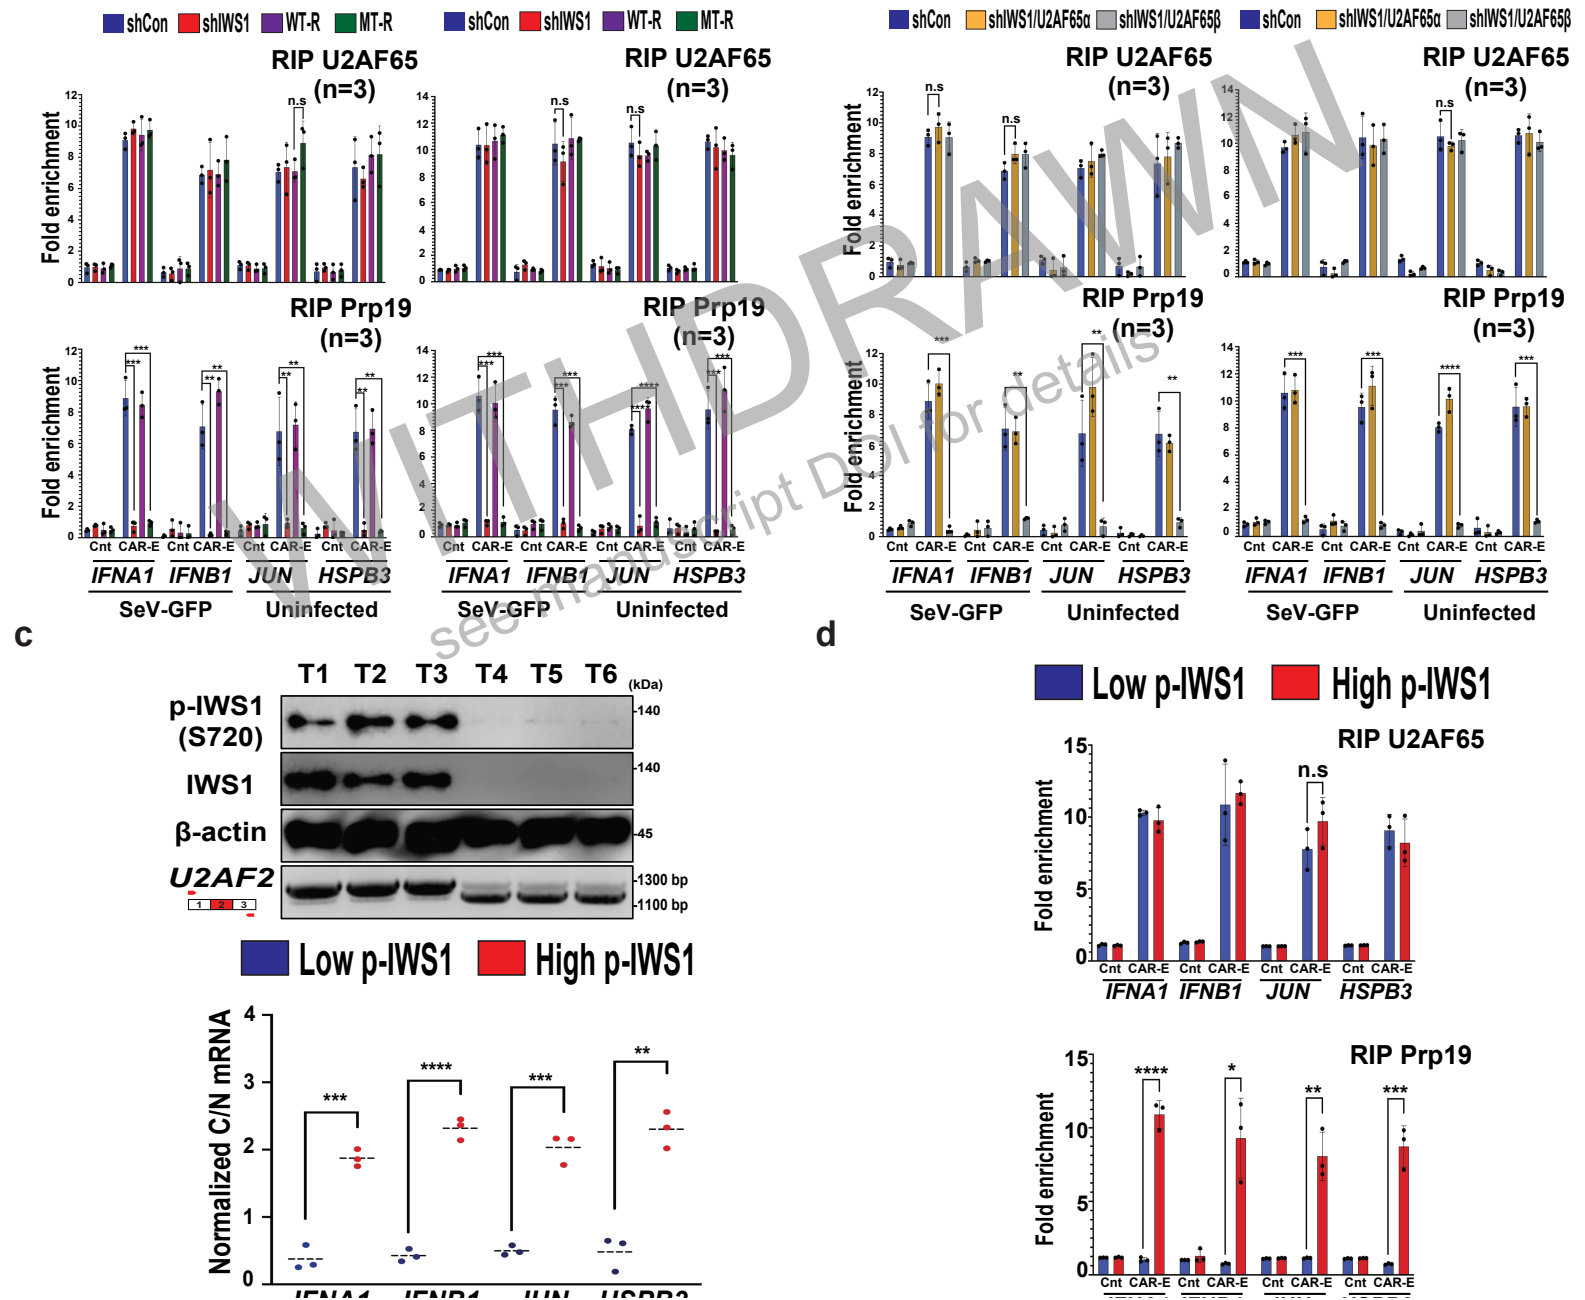

Figure 4

a

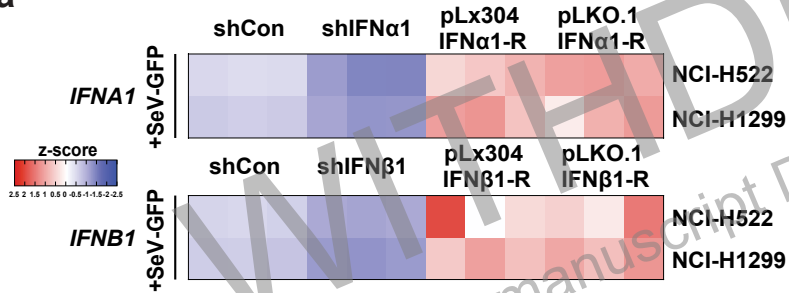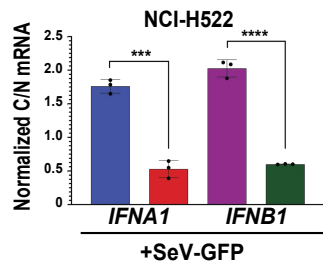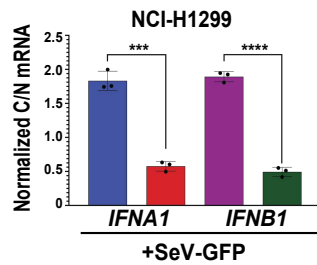

b

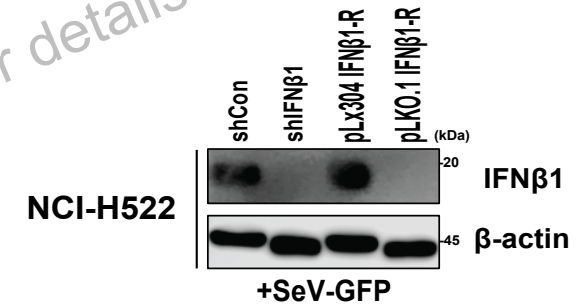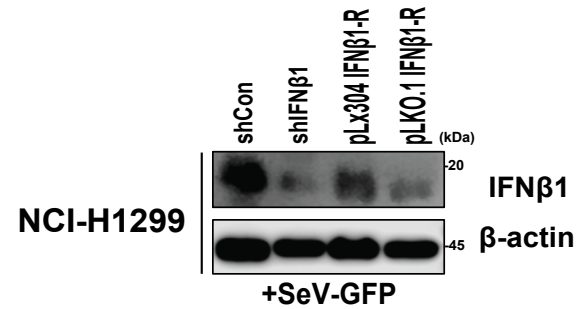



Figure 5

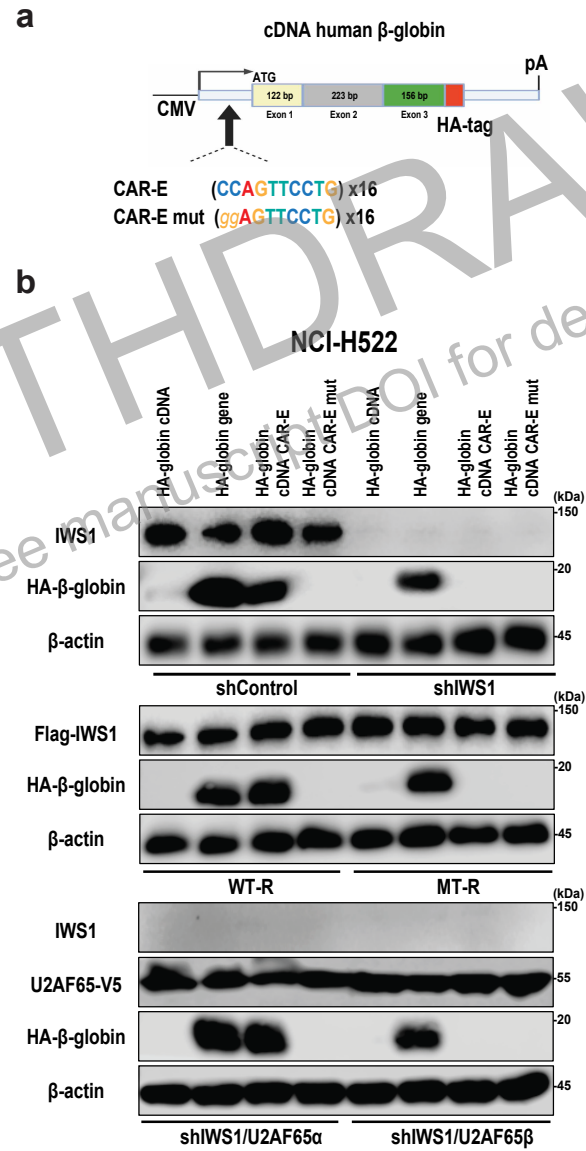

**Figure 6**

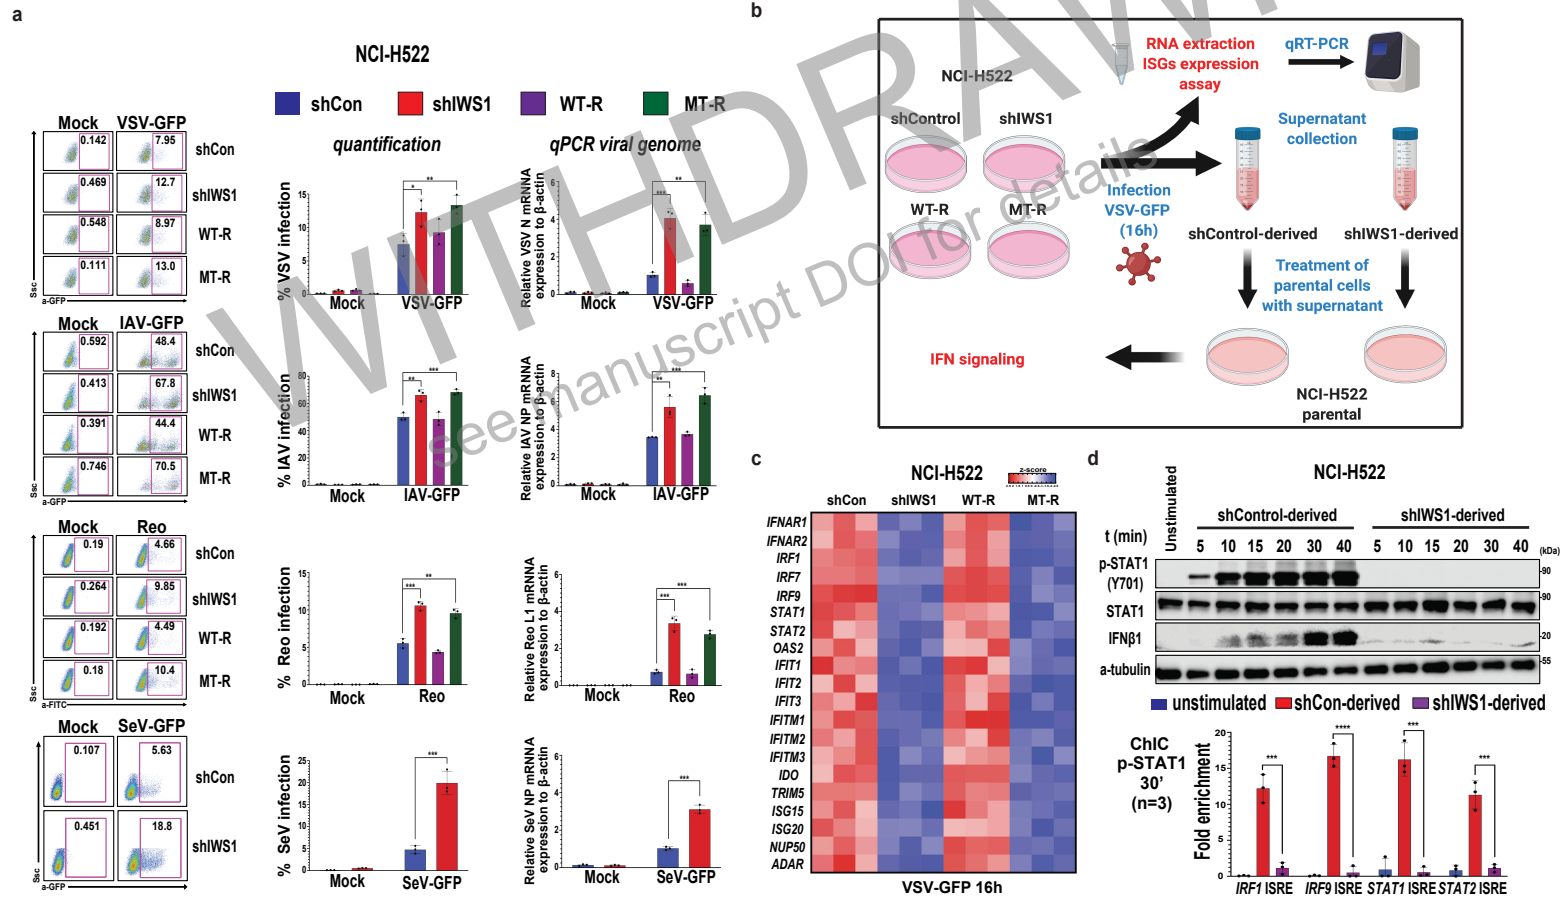

**Figure 7**

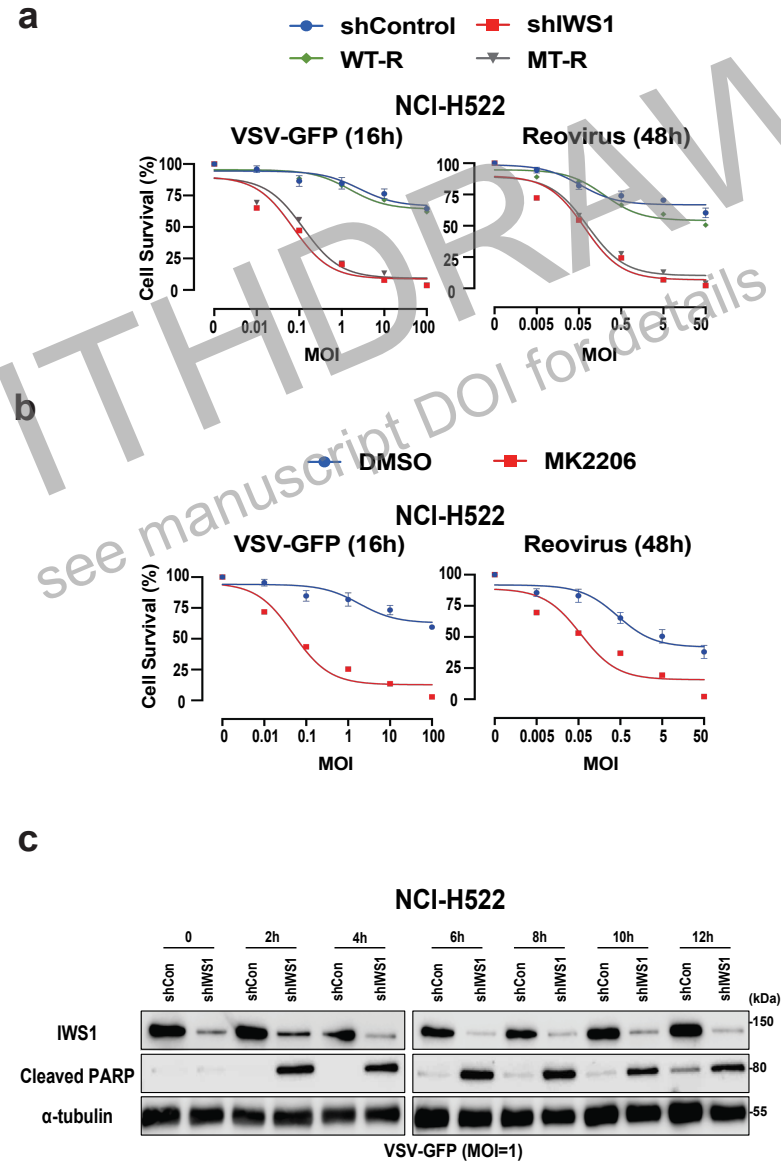

Figure 8

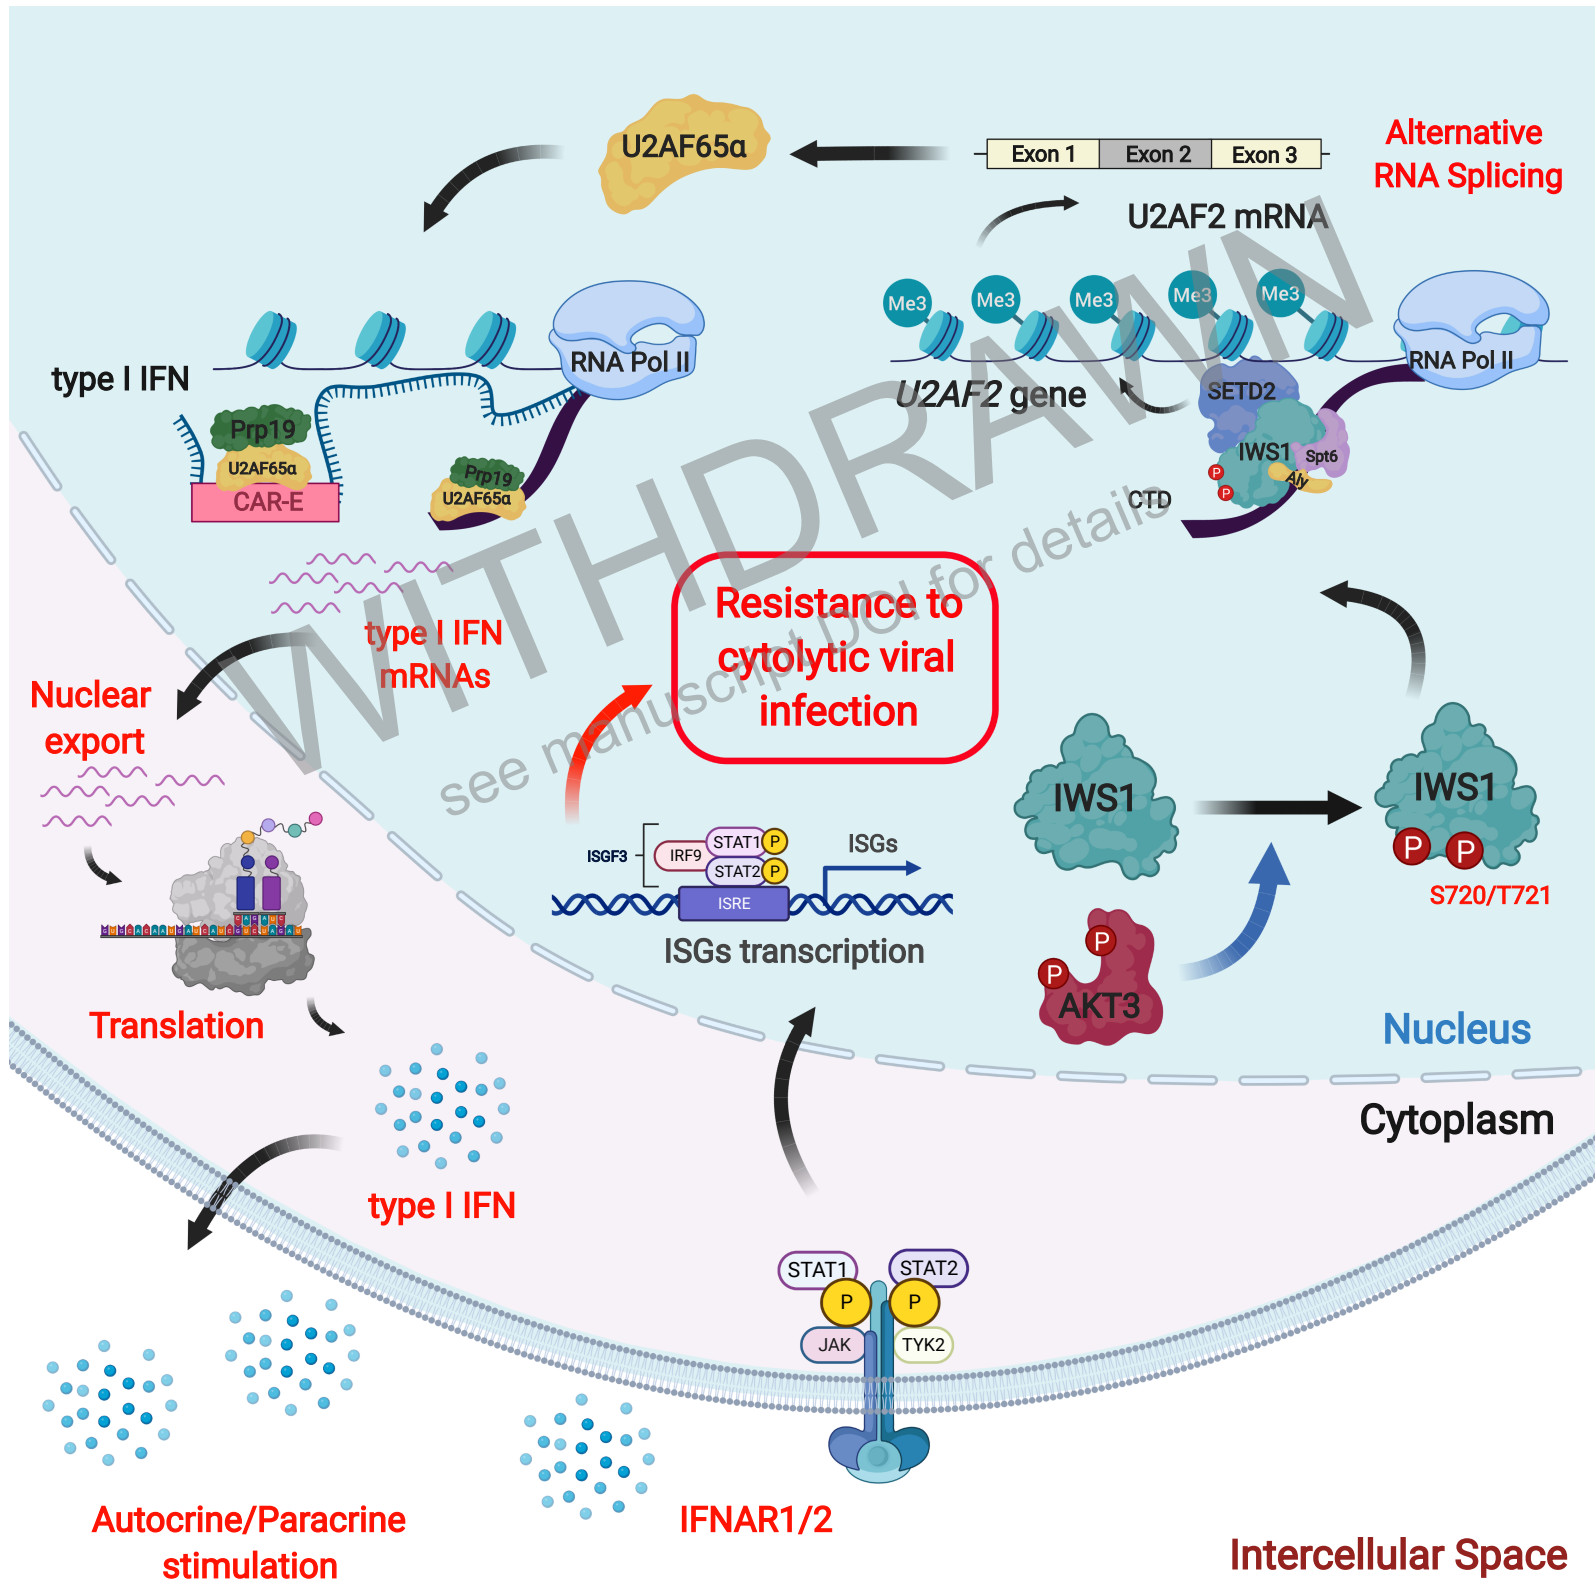

Source: https://www.biorxiv.org/content/10.1101/2020.12.26.424461v4.full.pdf
